# Supplementary material for: Associations of proteomic age with mortality and incident chronic diseases in the European Prospective Investigation into Cancer and Nutrition (EPIC)
Source: Research Square preprint supplement (doi:10.21203/rs.3.rs-7087230/v1), 2025-07-15
Supplement: Supplementary file 1 [file 5315af82501f32059c6e6cb4.docx]

**Supplementary Figures**

**
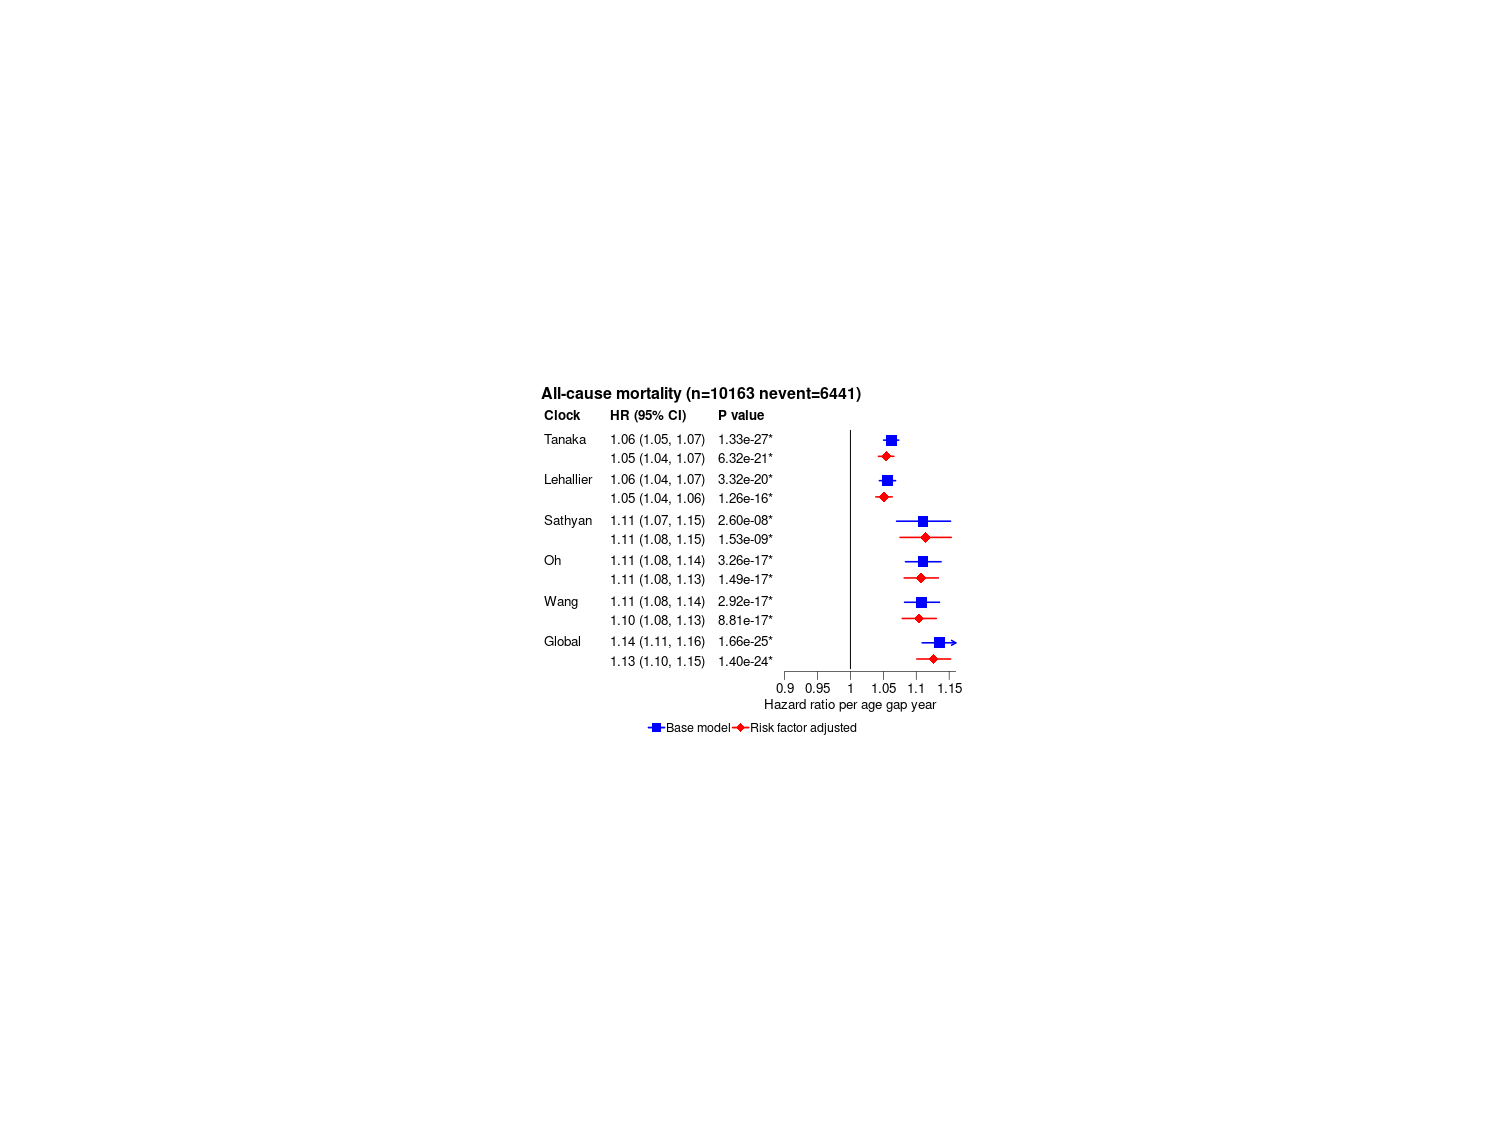
**

***Figure S1: Hazard ratios per classical proteomic age gap year with all -cause mortality.*** *All models stratified by study centre, sex, and five-year age group. Risk factor adjusted model additionally adjusted for education level, smoking status, alcohol consumption, BMI, healthy diet score and physical activity. All error bars show 95% confidence intervals.*


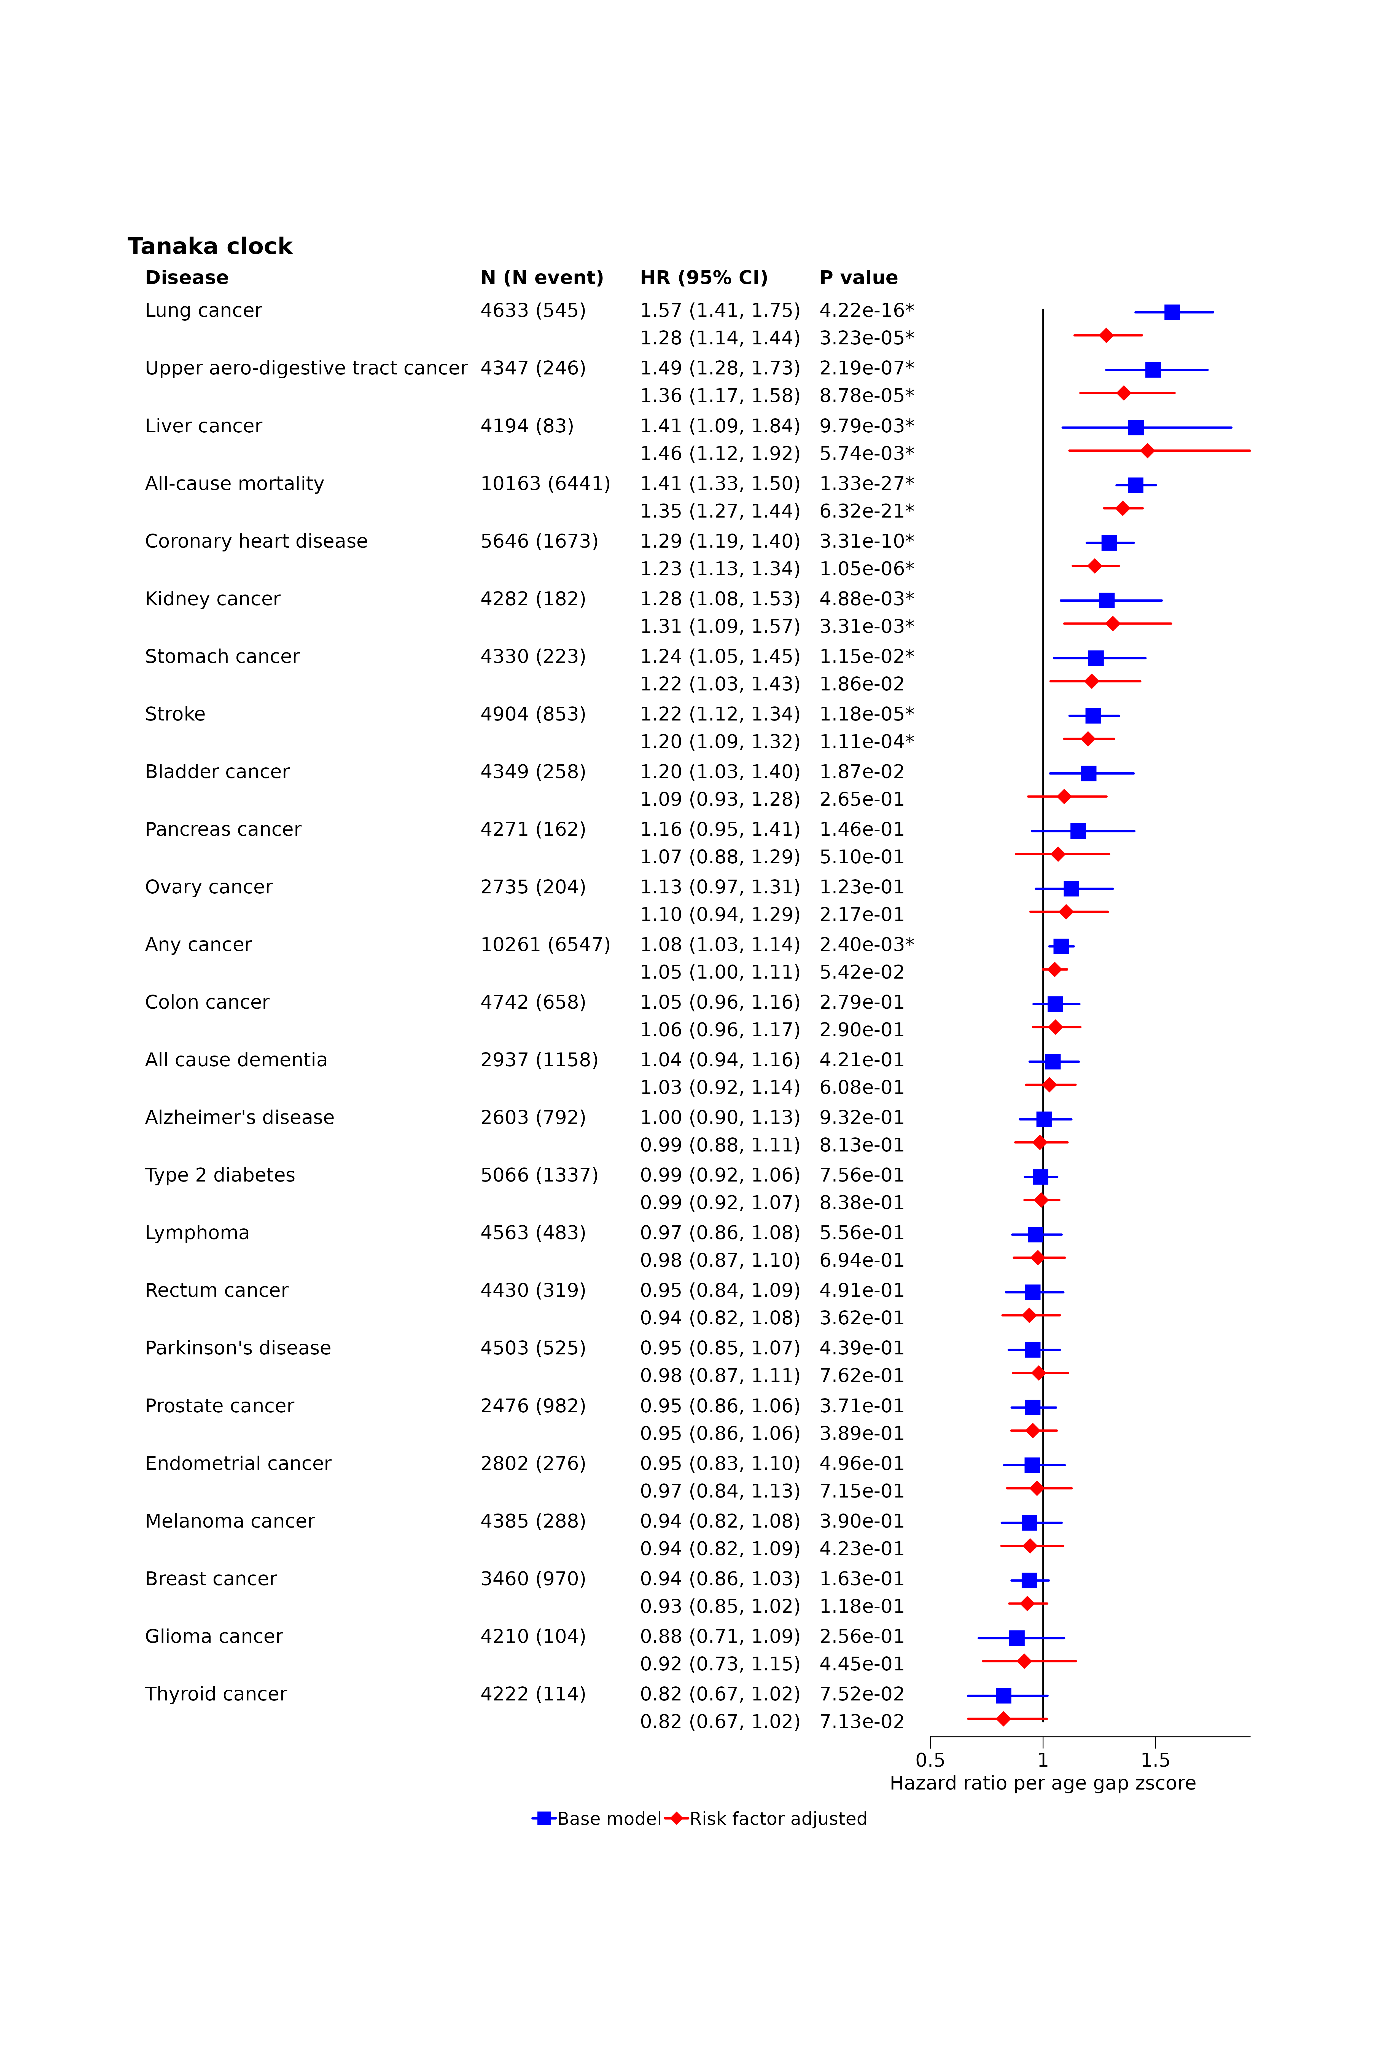


***Figure S2: Comparison of strengths of associations with Tanaka proteomic age across disease endpoints.*** *Hazard ratios per Tanaka proteomic age gap z-score with all -cause mortality and 25 incident diseases. All models stratified by study centre, sex, and five-year age group. Risk factor adjusted model additionally adjusted for education level, smoking status, alcohol consumption, BMI, healthy diet score and physical activity. All error bars show 95% confidence intervals.*


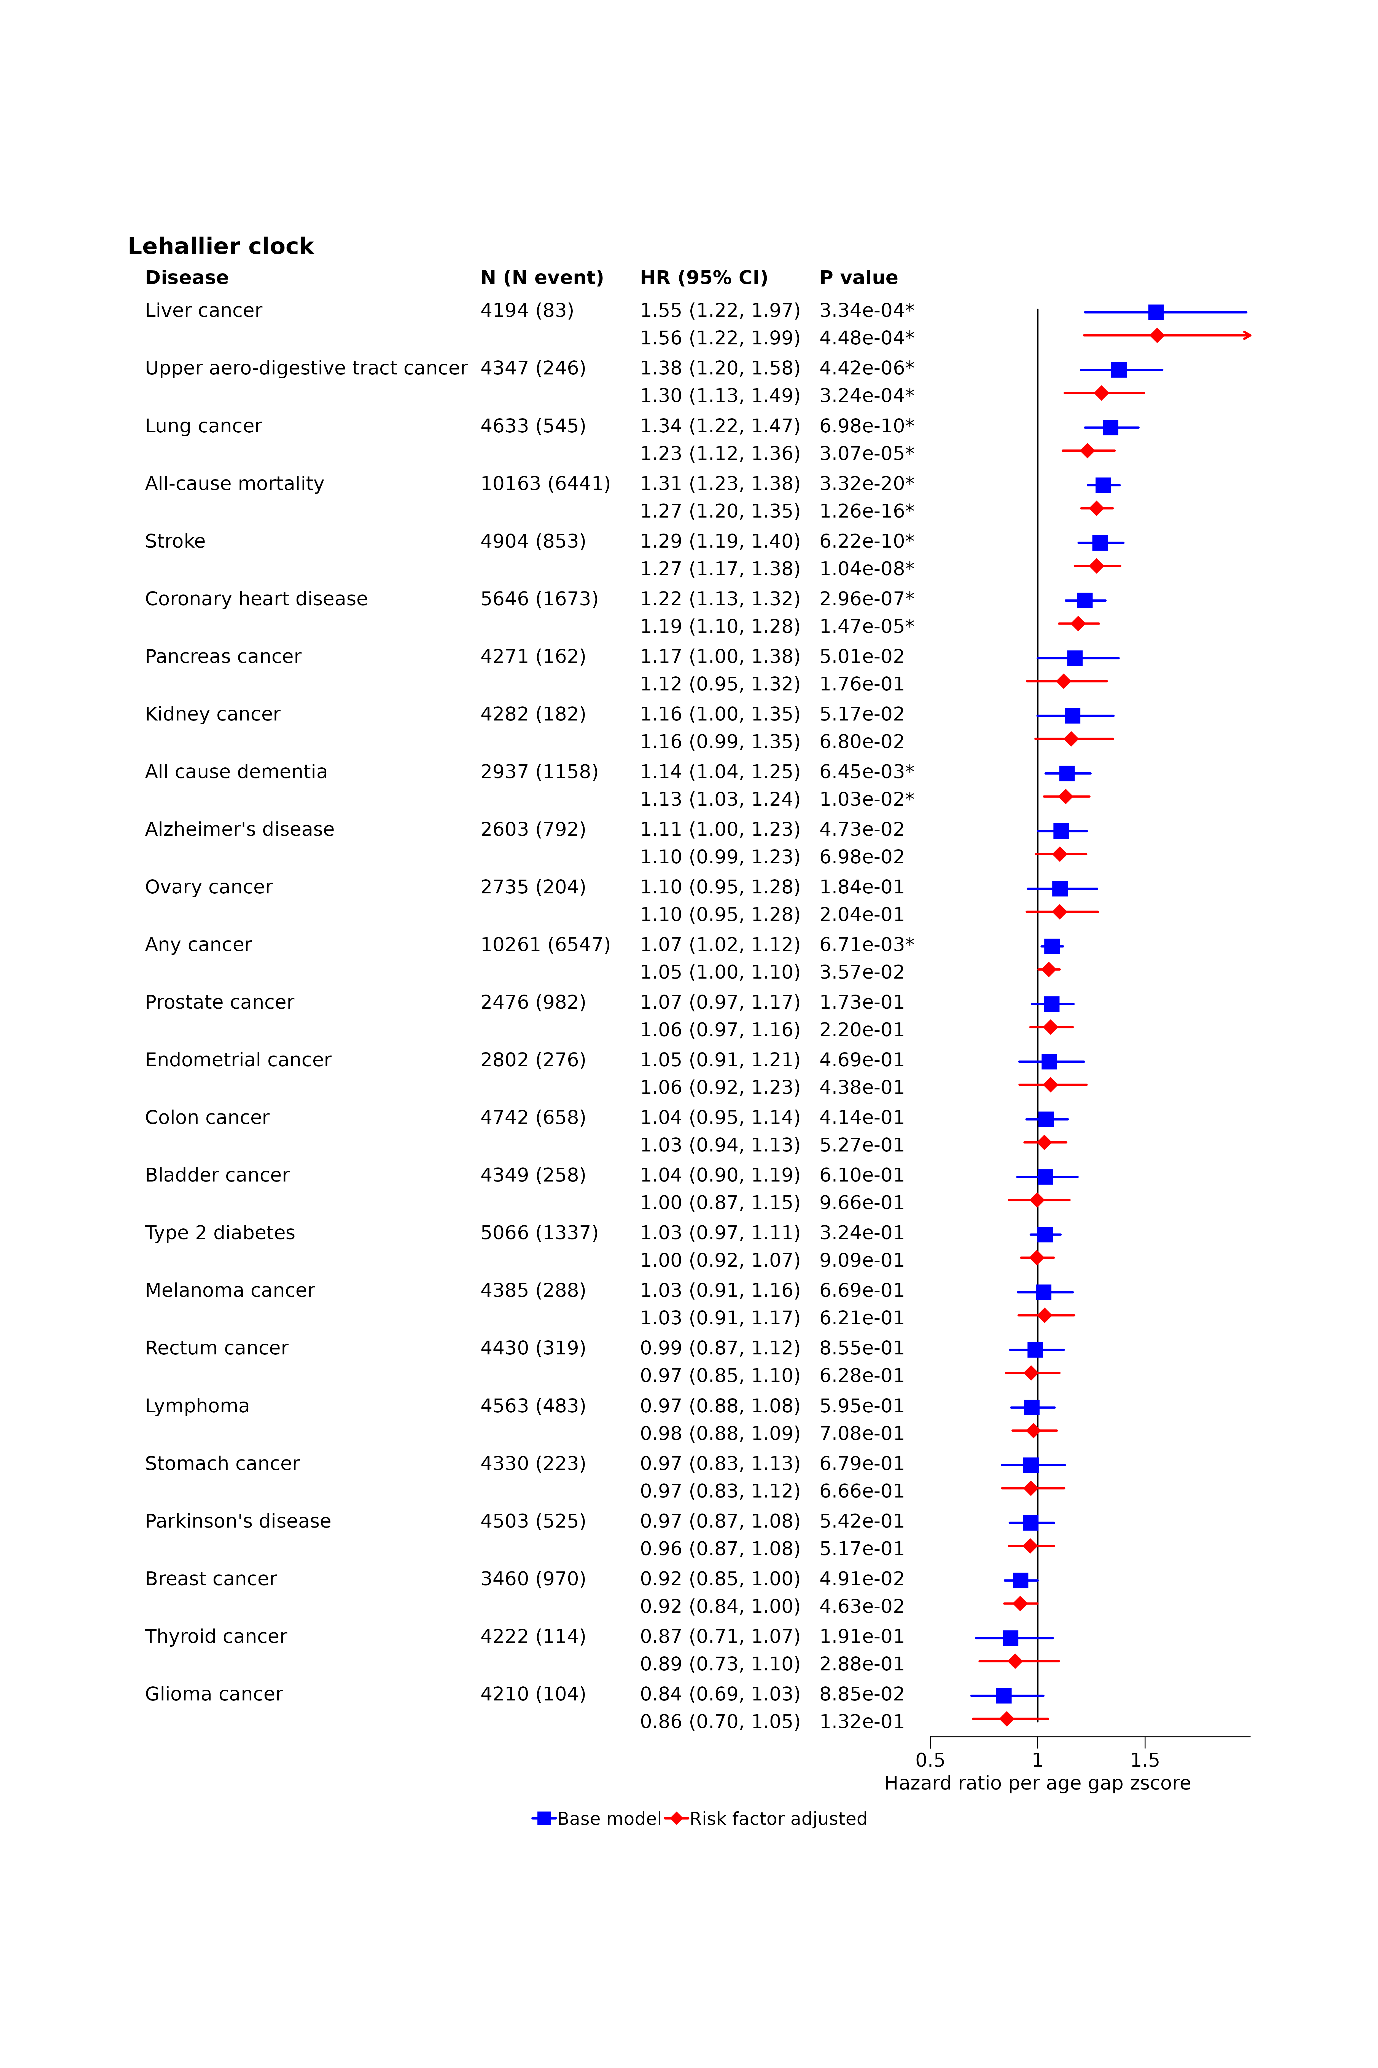


***Figure S3: Comparison of strengths of associations with Lehallier proteomic age across disease endpoints.*** *Hazard ratios per Lehallier proteomic age gap z-score with all -cause mortality and 25 incident diseases. All models stratified by study centre, sex, and five-year age group. Risk factor adjusted model additionally adjusted for education level, smoking status, alcohol consumption, BMI, healthy diet score and physical activity. All error bars show 95% confidence intervals.*


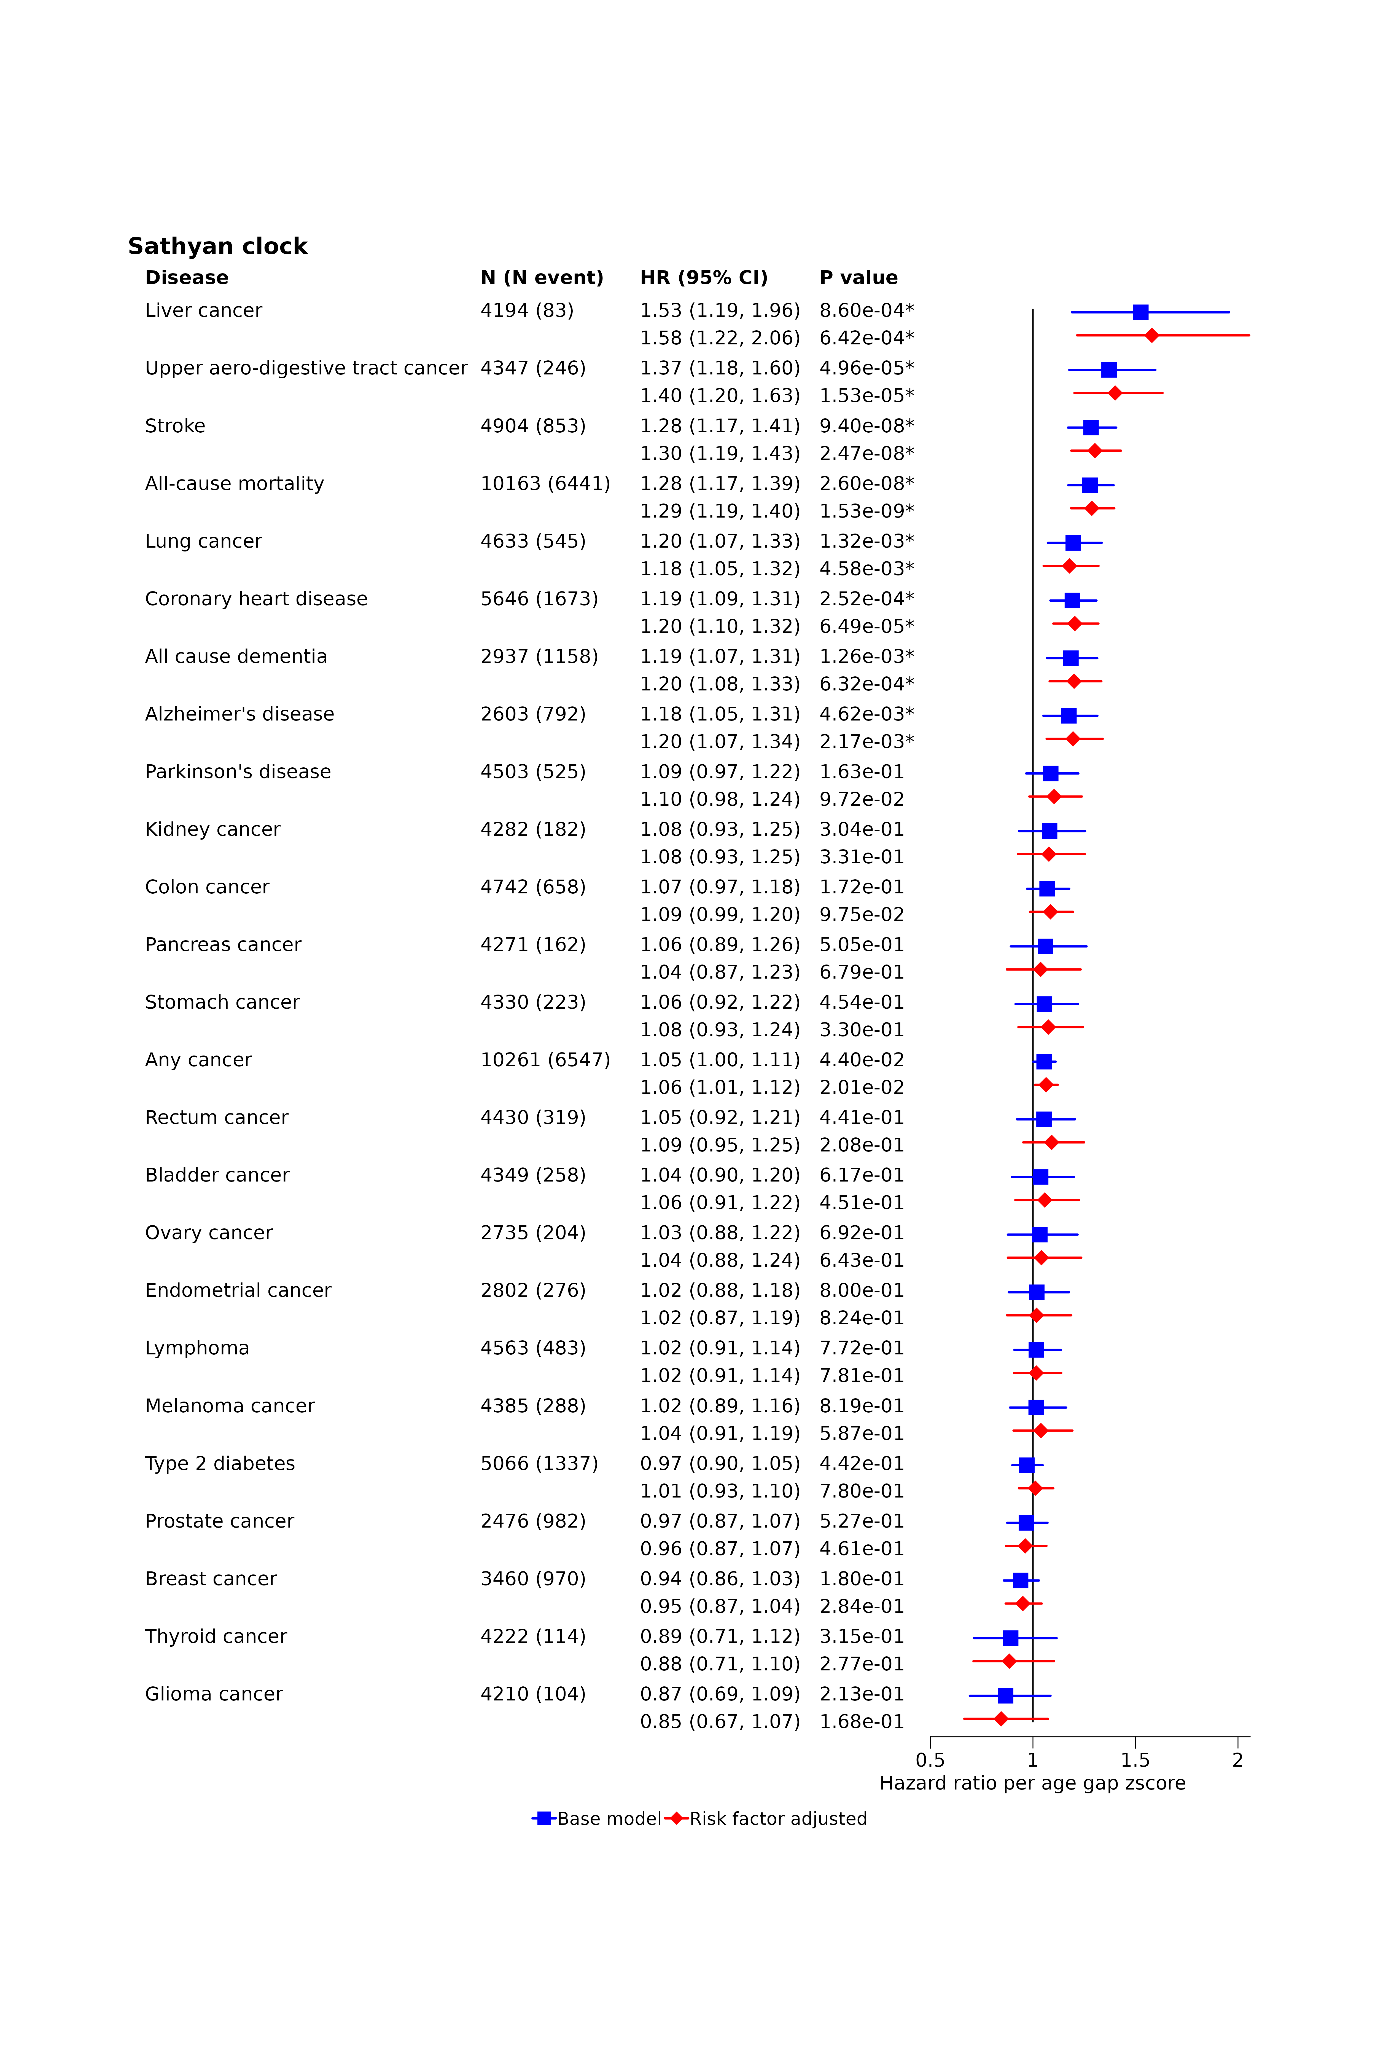


***Figure S4: Comparison of strengths of associations with Sathyan proteomic age across disease endpoints.*** *Hazard ratios per Sathyan proteomic age gap z-score with all -cause mortality and 25 incident diseases. All models stratified by study centre, sex, and five-year age group. Risk factor adjusted model additionally adjusted for education level, smoking status, alcohol consumption, BMI, healthy diet score and physical activity. All error bars show 95% confidence intervals.*


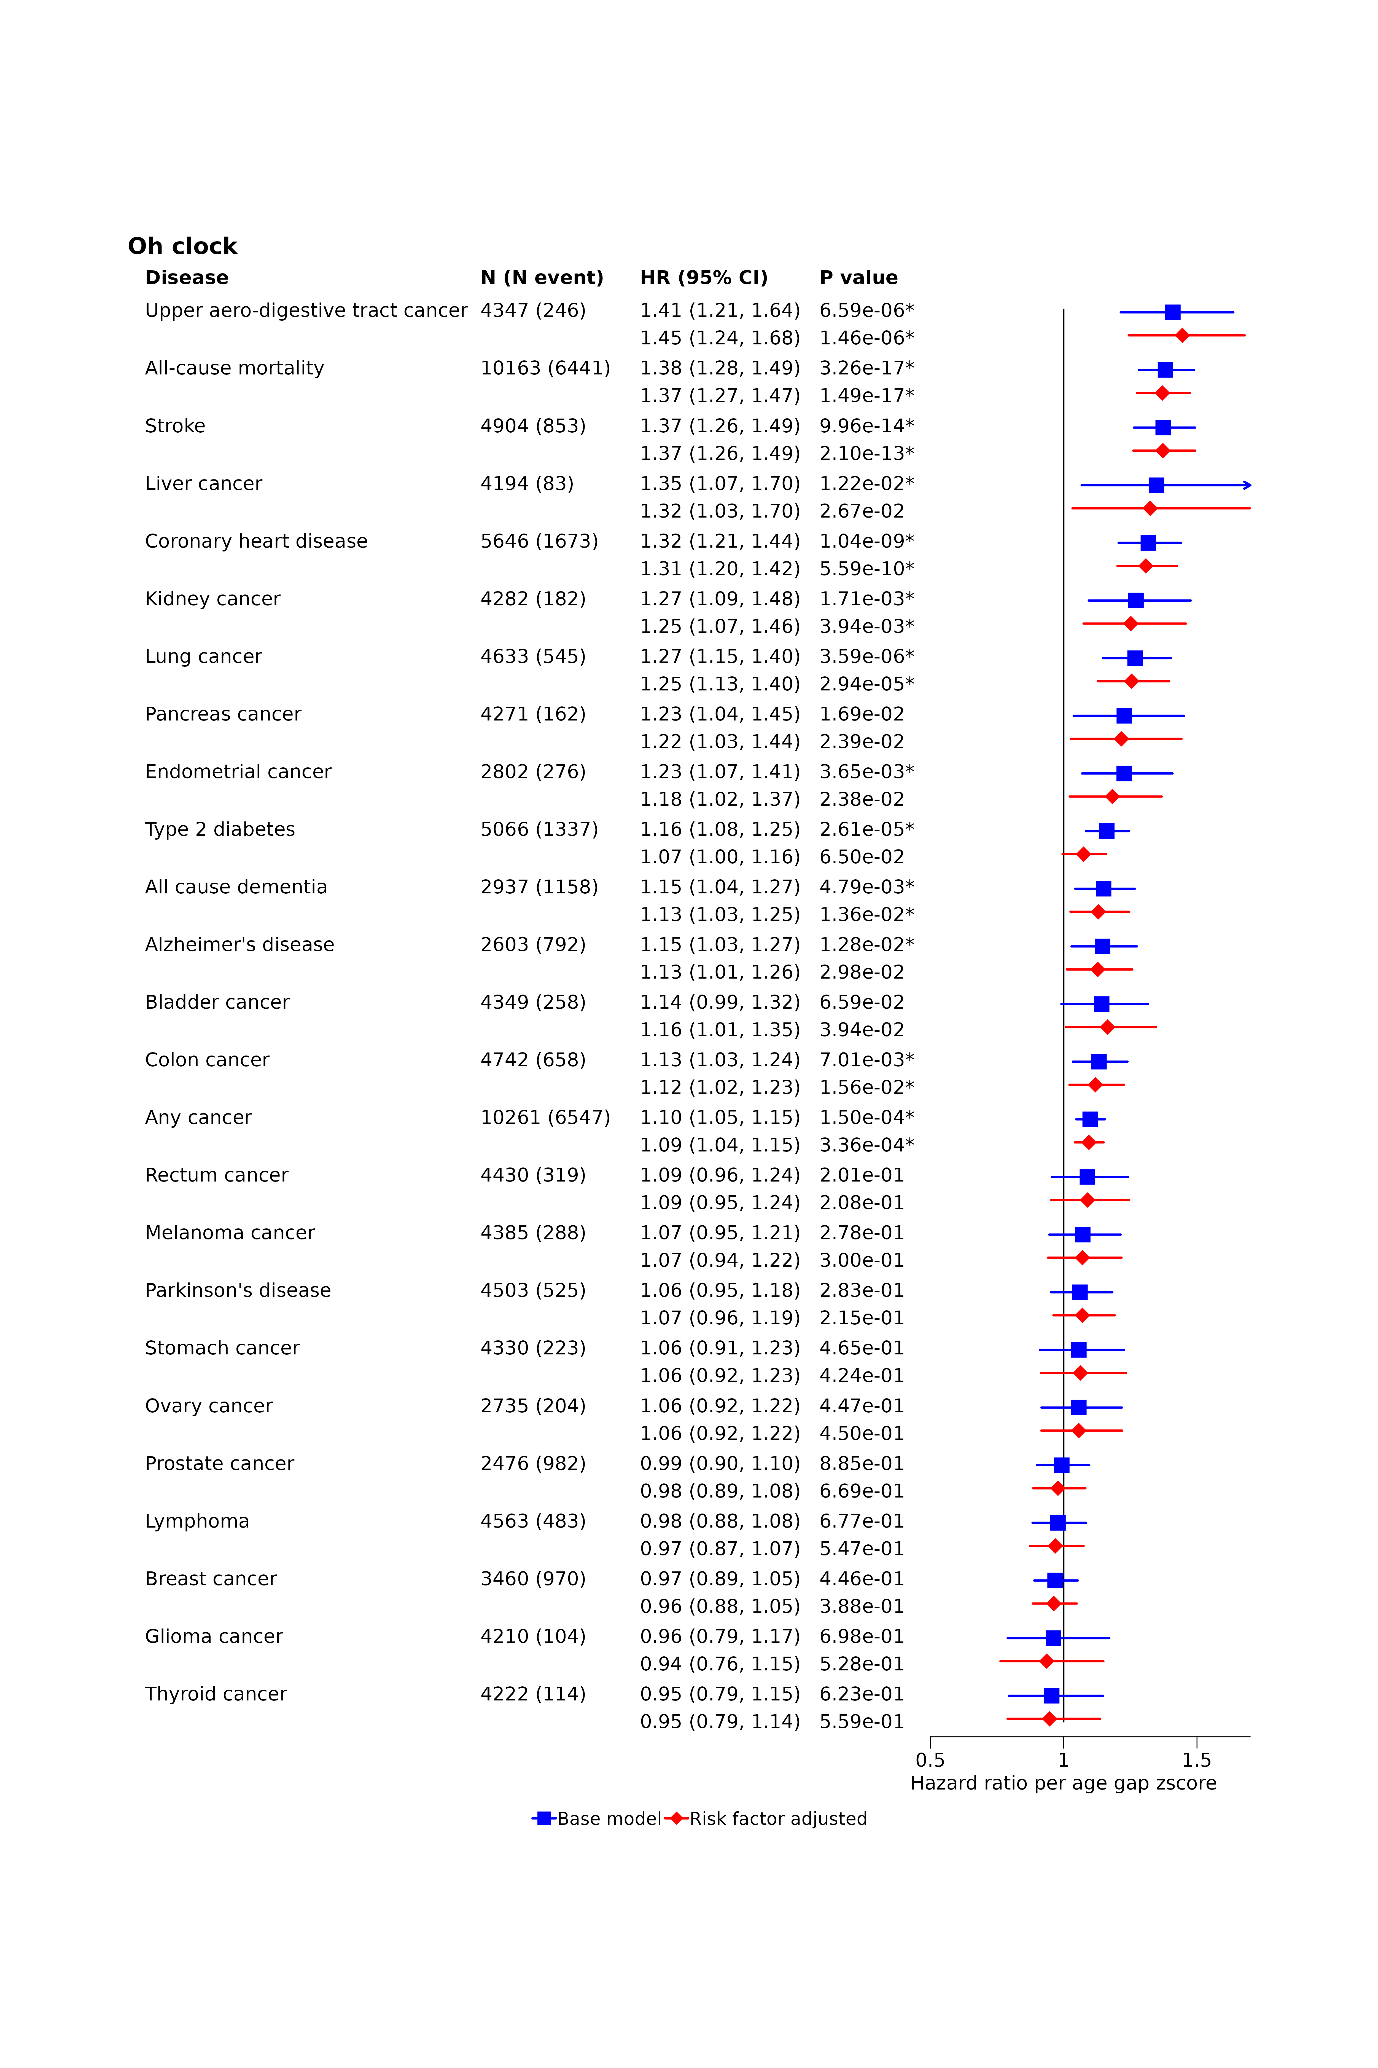


***Figure S5: Comparison of strengths of associations with Oh proteomic age across disease endpoints.*** *Hazard ratios per Oh proteomic age gap z-score with all -cause mortality and 25 incident diseases. All models stratified by study centre, sex, and five-year age group. Risk factor adjusted model additionally adjusted for education level, smoking status, alcohol consumption, BMI, healthy diet score and physical activity. All error bars show 95% confidence intervals.*


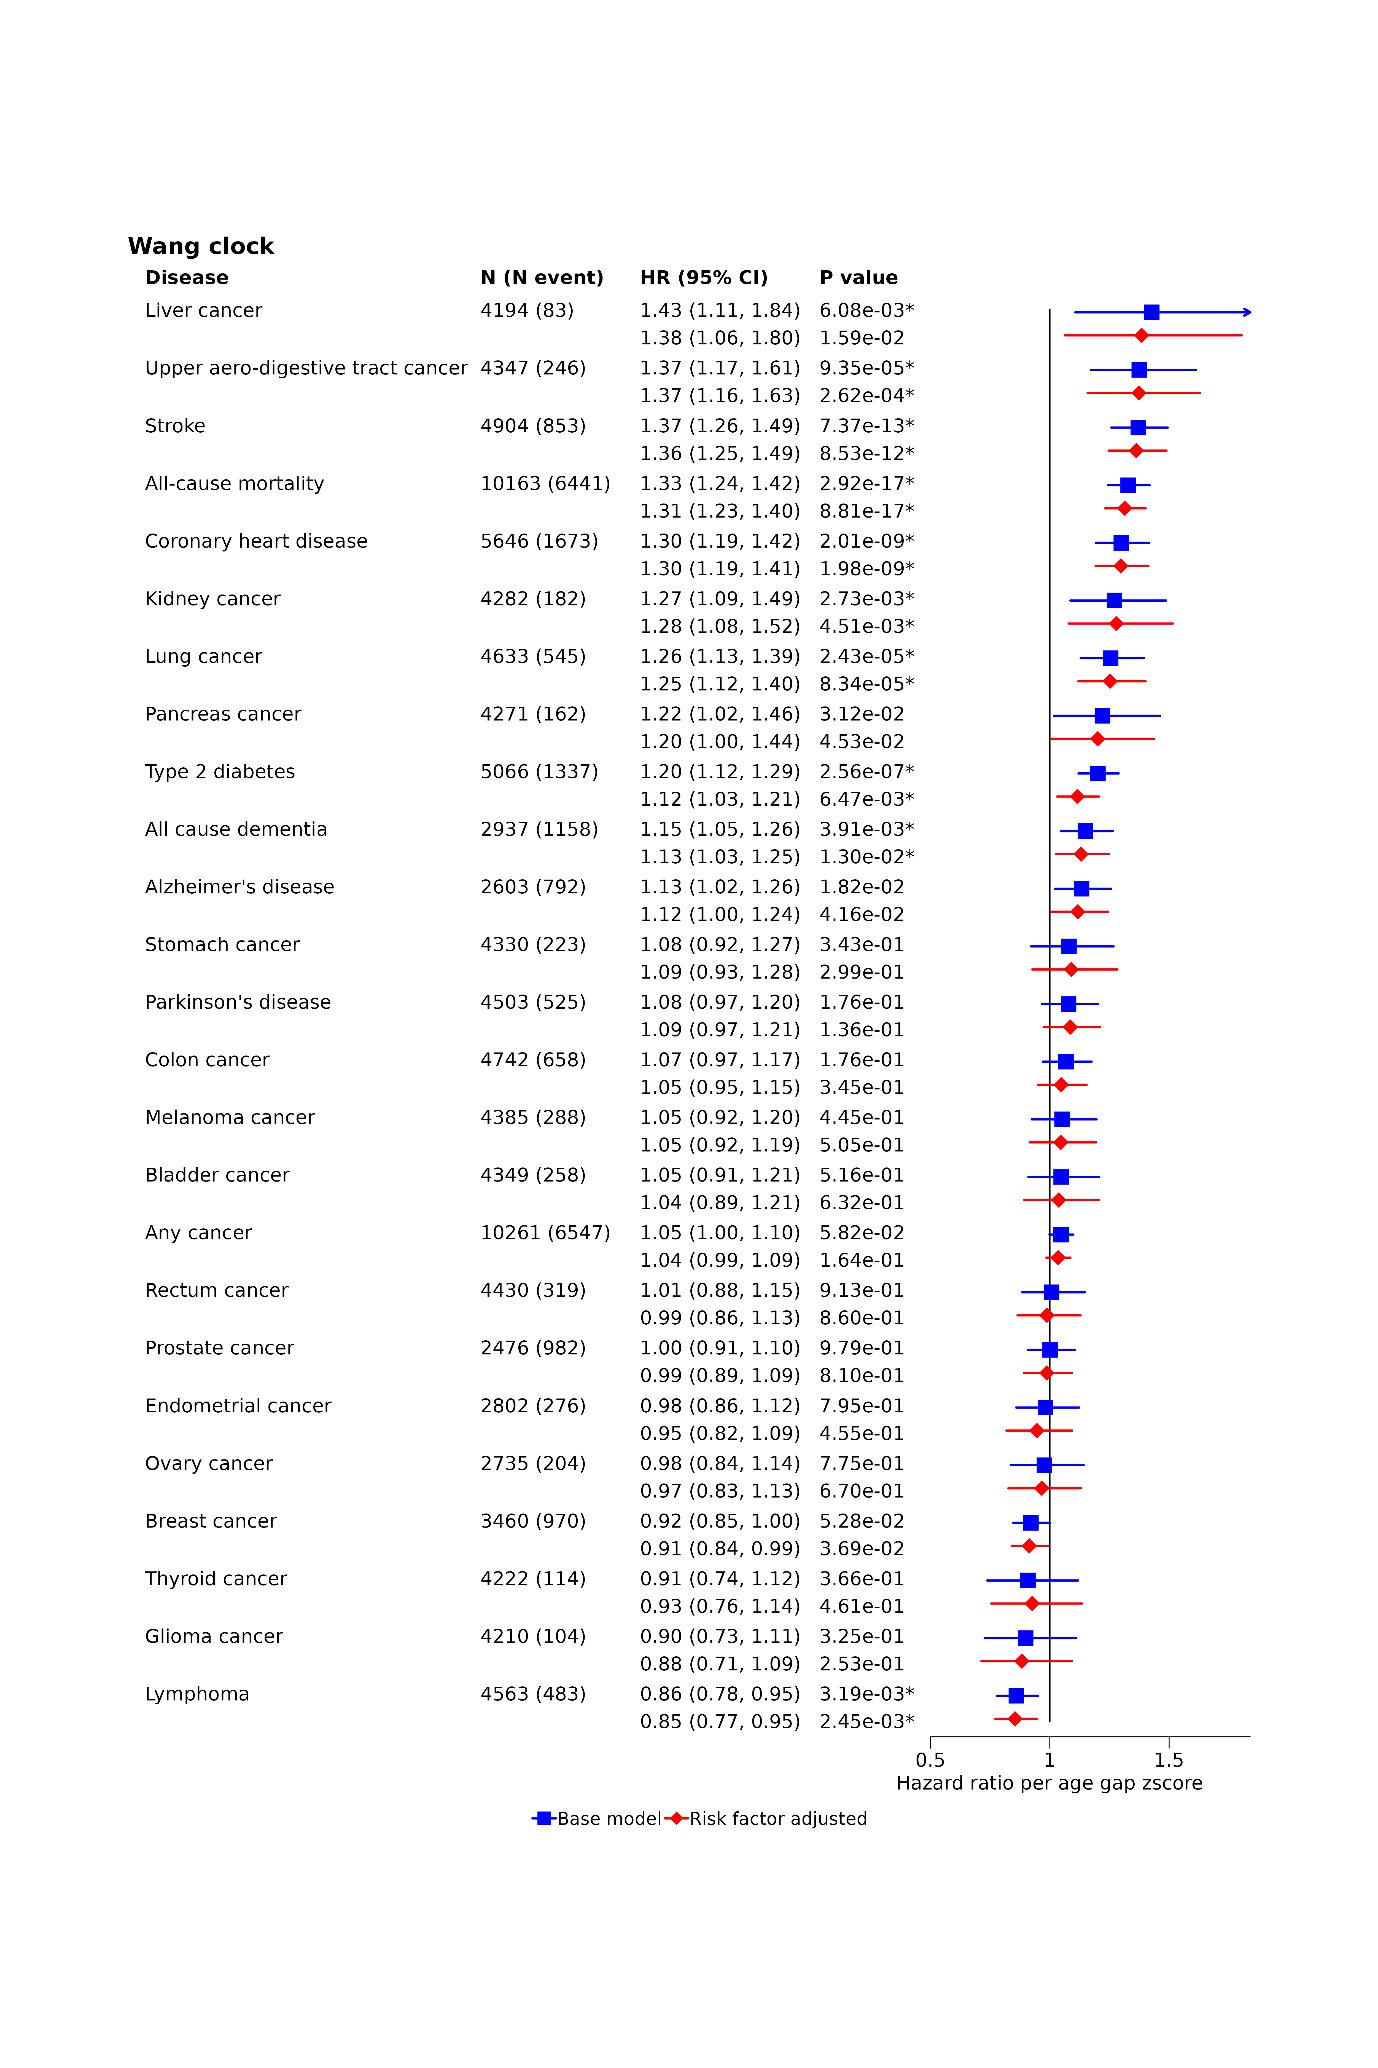


***Figure S6: Comparison of strengths of associations with Wang proteomic age across disease endpoints.*** *Hazard ratios per Wang proteomic age gap z-score with all -cause mortality and 25 incident diseases. All models stratified by study centre, sex, and five-year age group. Risk factor adjusted model additionally adjusted for education level, smoking status, alcohol consumption, BMI, healthy diet score and physical activity. All error bars show 95% confidence intervals.*


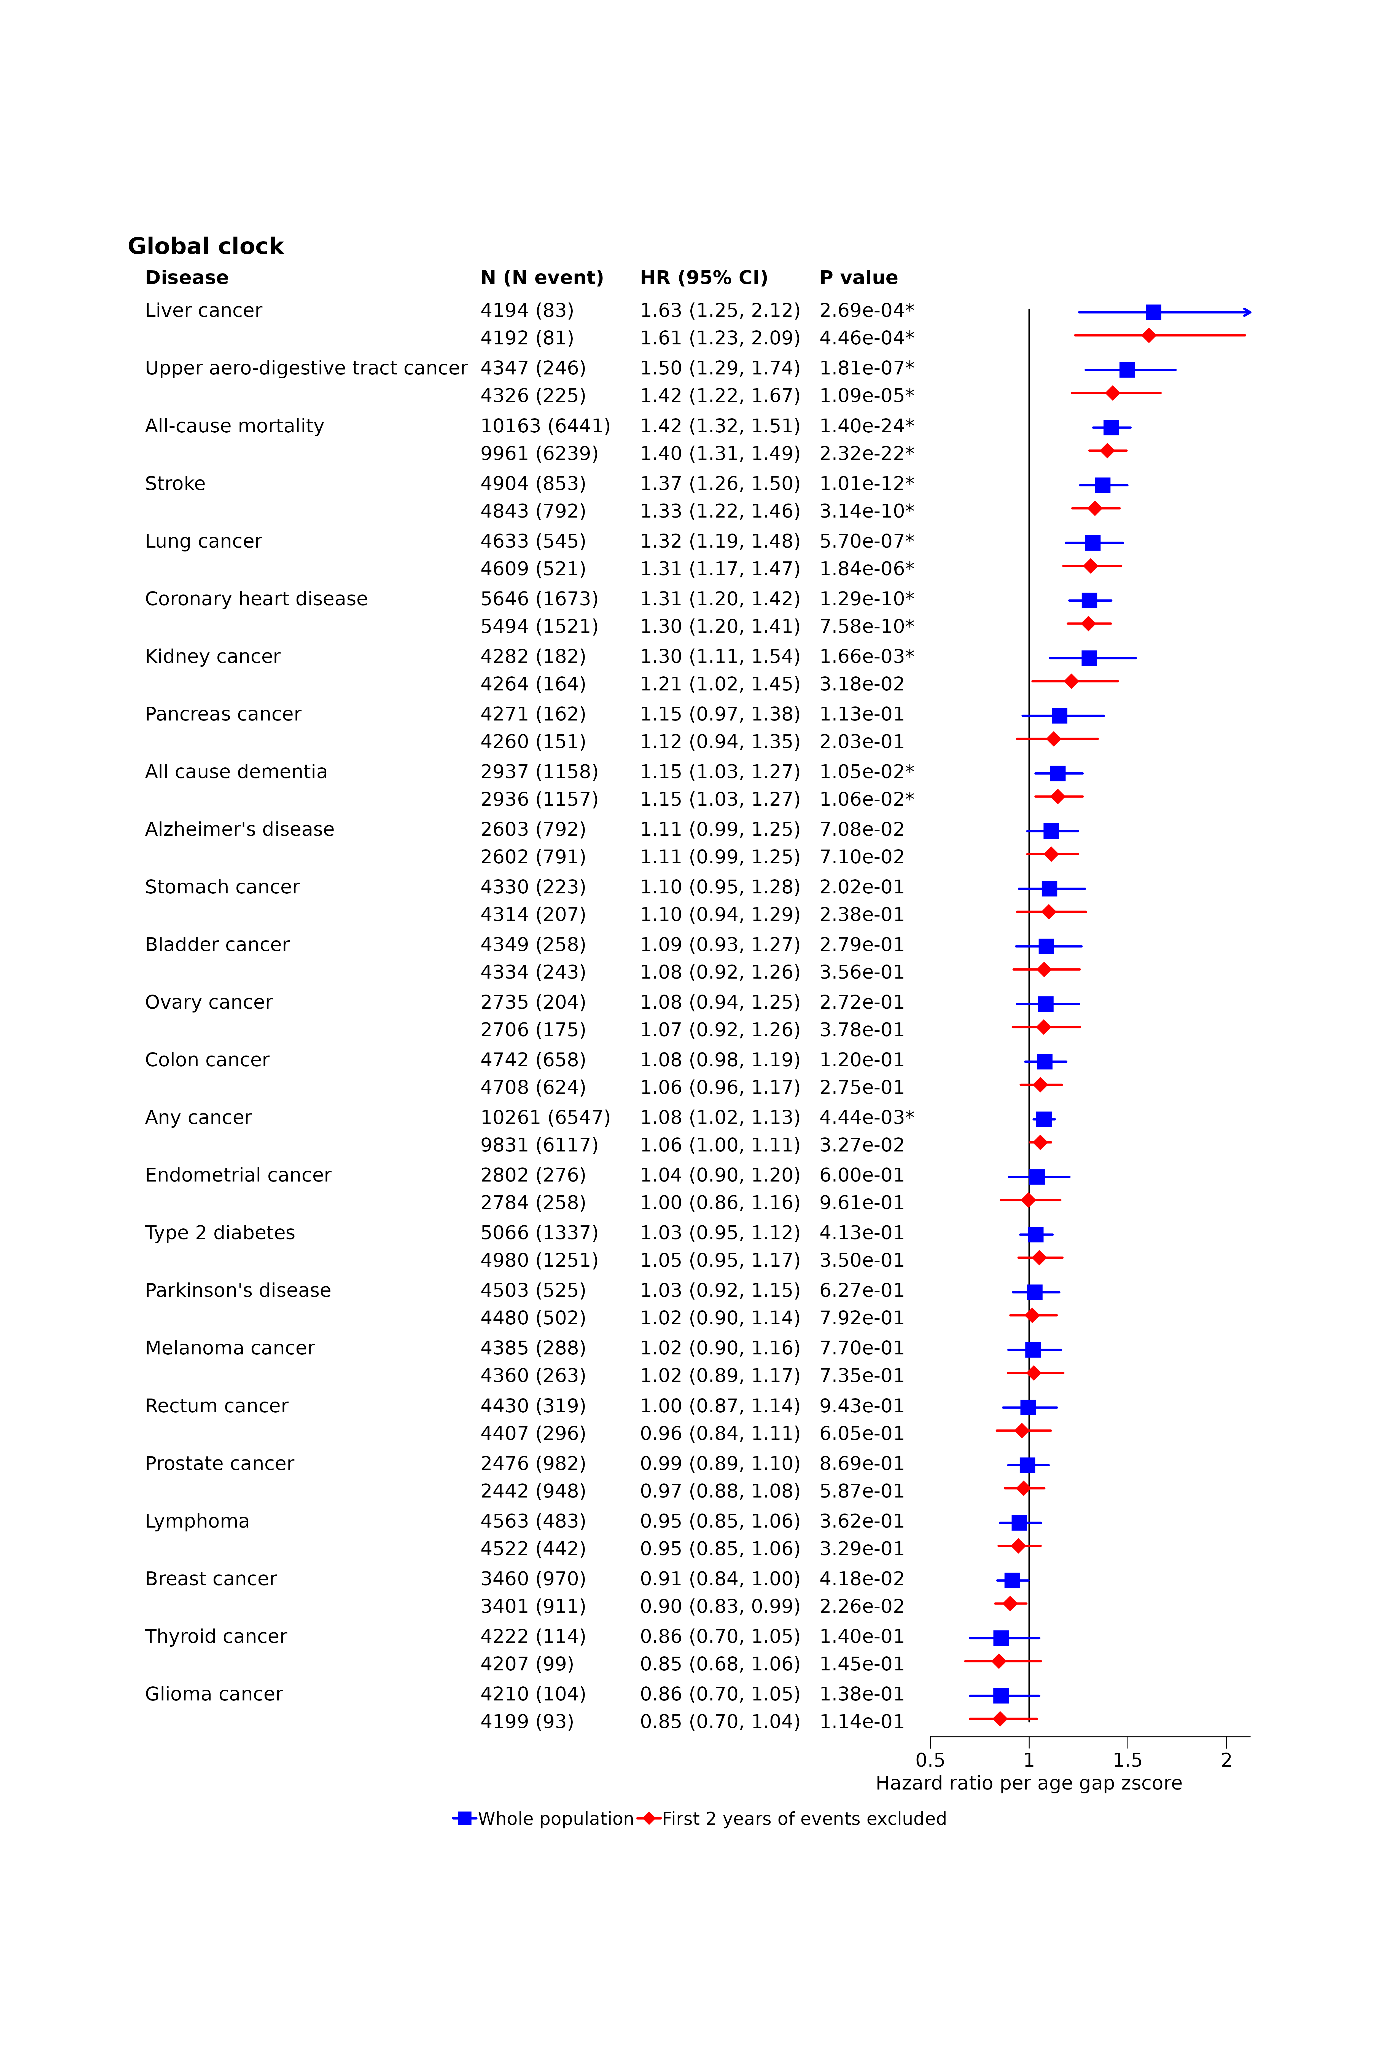


***Figure S7: Associations with Global proteomic age across disease endpoints for all events (blue bars) and with events restricted only to events that occurred after two years from baseline (red bars).*** *Hazard ratios per Global proteomic age gap z-score with all -cause mortality and 25 incident diseases. All models stratified by study centre, sex, and five-year age group and adjusted for education level, smoking status, alcohol consumption, BMI, healthy diet score and physical activity. All error bars show 95% confidence intervals.*


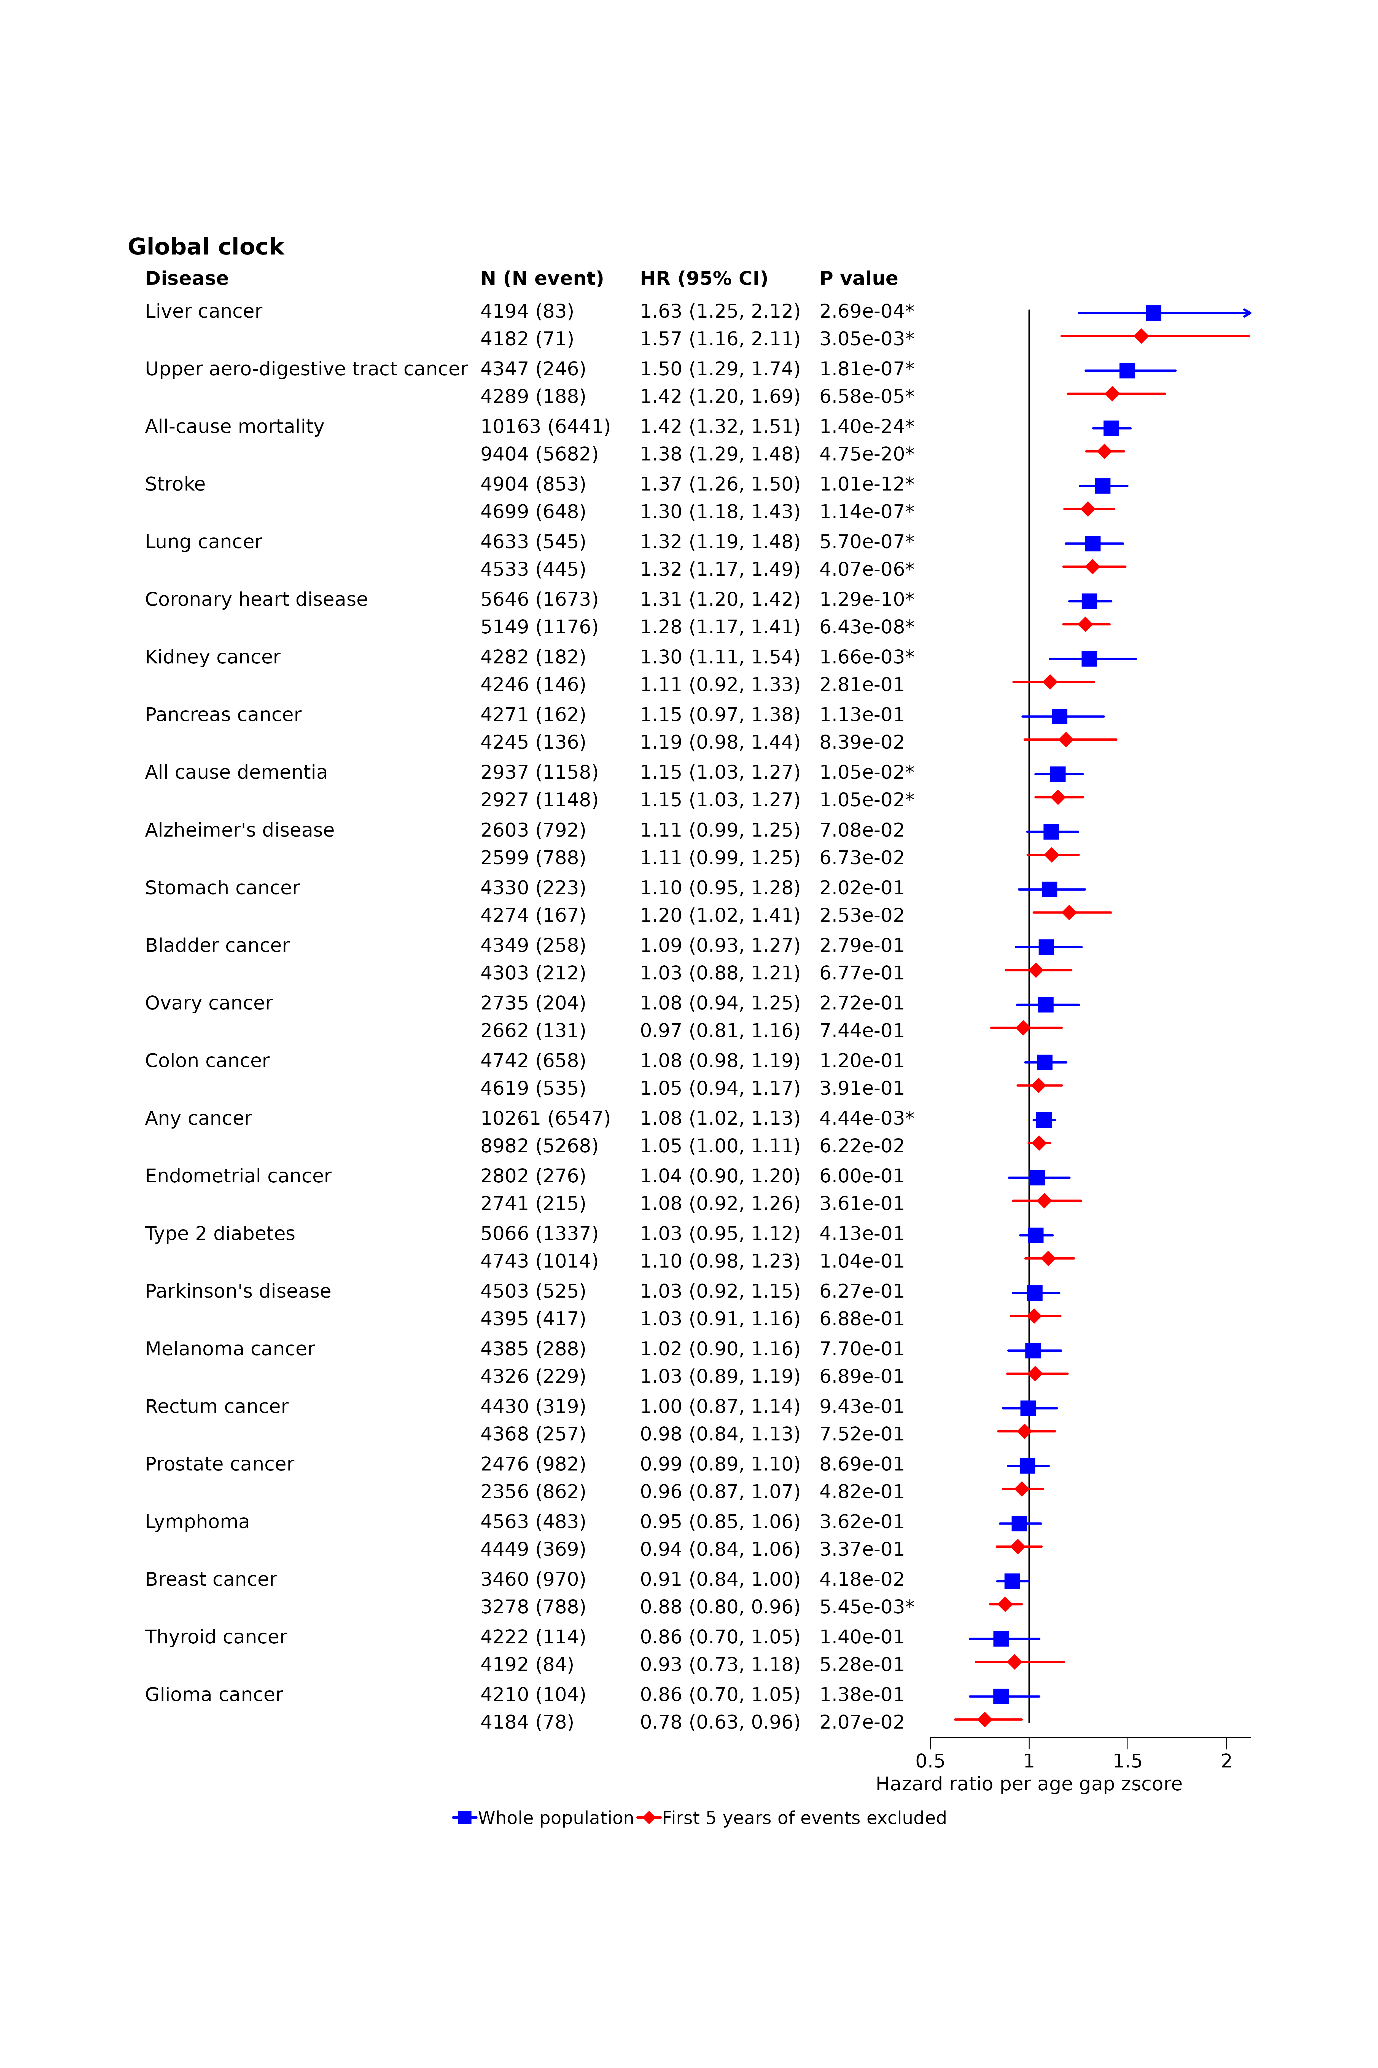


***Figure S8: Associations with Global proteomic age across disease endpoints for all events (blue bars) and with events restricted only to events that occurred after five years from baseline (red bars).*** *Hazard ratios per Global proteomic age gap z-score with all -cause mortality and 25 incident diseases. All models stratified by study centre, sex, and five-year age group and adjusted for education level, smoking status, alcohol consumption, BMI, healthy diet score and physical activity. All error bars show 95% confidence intervals.*


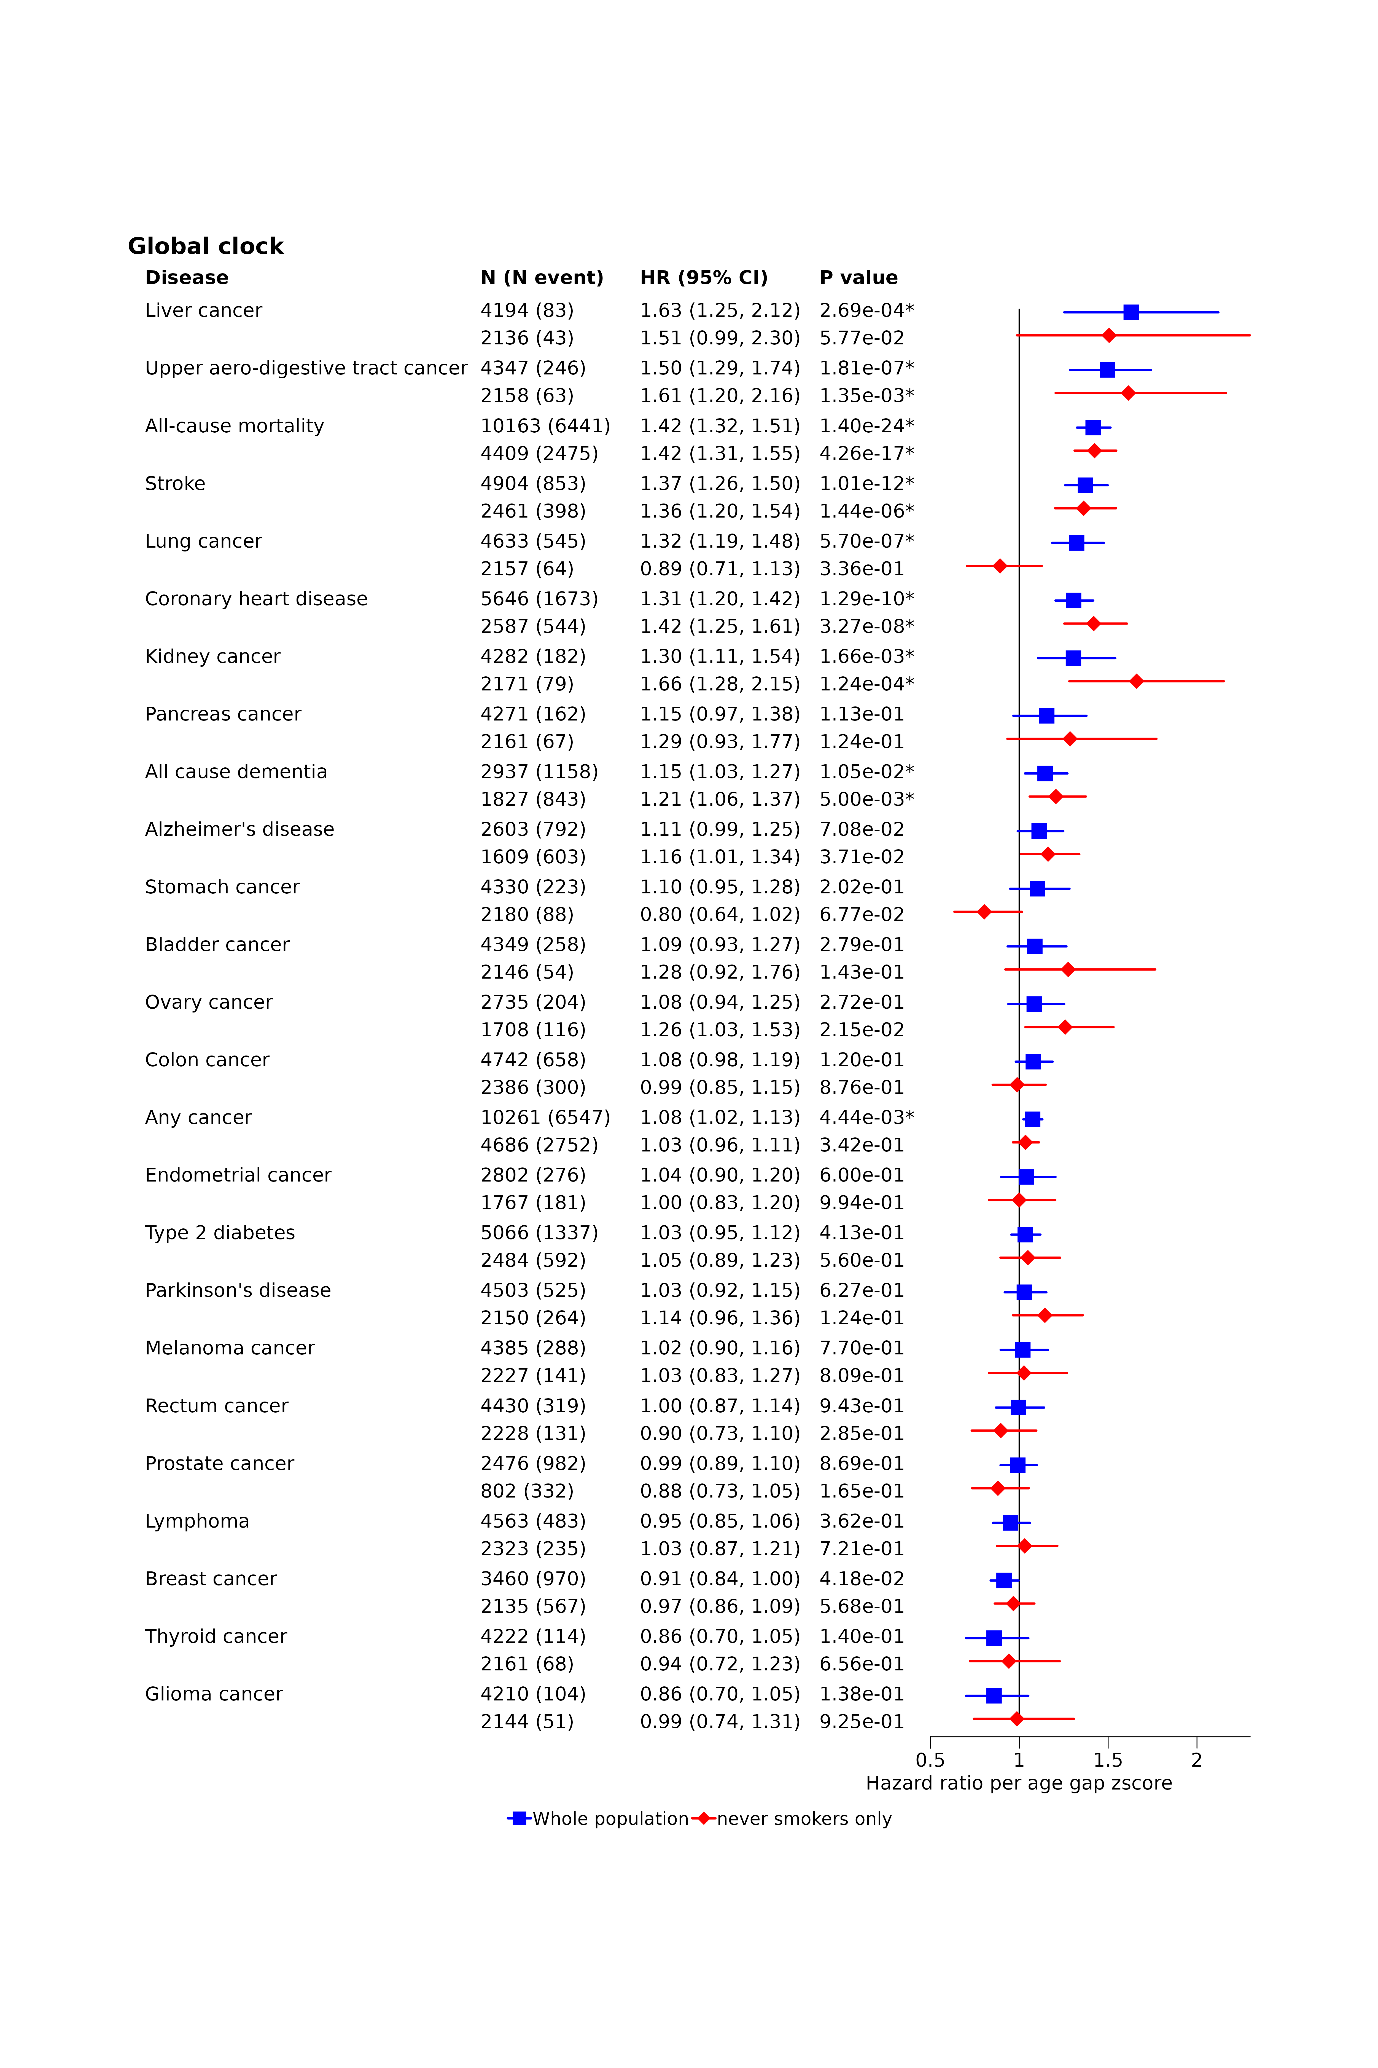


***Figure S9: Associations with Global proteomic age across disease endpoints for whole population (blue bars) and for never smokers only (red bars).*** *Hazard ratios per Global proteomic age gap z-score with all -cause mortality and 25 incident diseases. All models stratified by study centre, sex, and five-year age group and adjusted for education level, smoking status (whole population only), alcohol consumption, BMI, healthy diet score and physical activity. All error bars show 95% confidence intervals.*


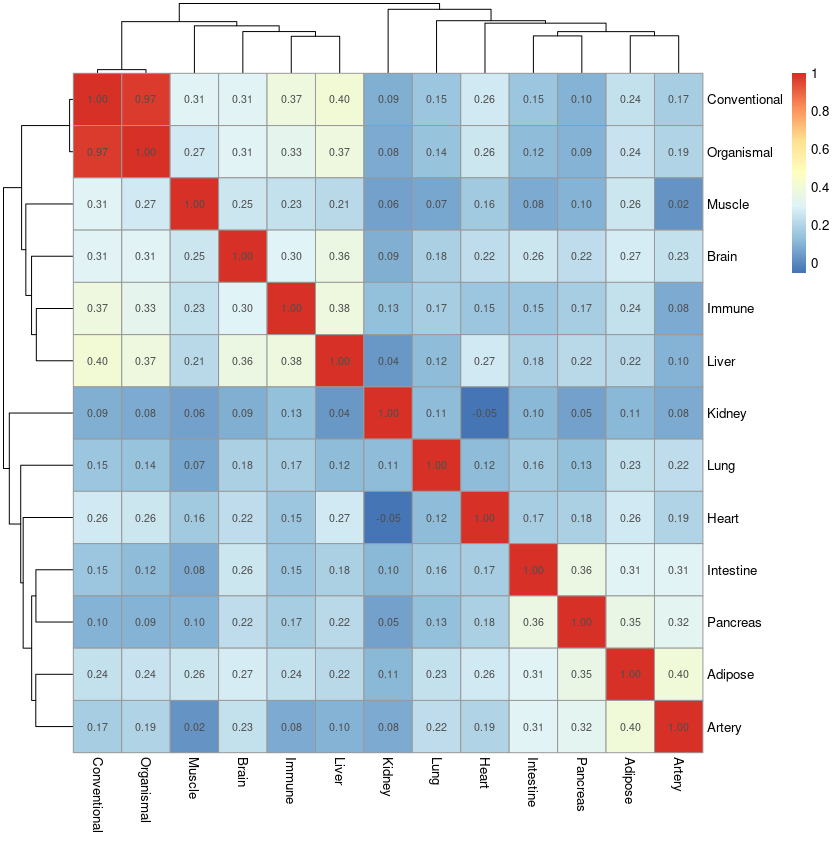


***Figure S10: Correlation heatmap of organ specific proteomic age gaps.***

***Figure S11: Coefficients of lasso selected model of all-cause mortality.*** *Model additionally stratified by study centre, sex, and five-year age group. All error bars show 95% confidence intervals.*
