# Supplementary material for: Associations of proteomic age with mortality and incident chronic diseases in the European Prospective Investigation into Cancer and Nutrition (EPIC)
Source: Research Square preprint supplement (doi:10.21203/rs.3.rs-7087230/v1), 2025-07-15
Supplement: Supplementary file 2 [file b82794dea3d82b85de62d8b4.docx]

**Table S1: Characteristics of the EPIC Main Subcohort*.**

|  | Italy | Spain | United Kingdom | The Netherlands | Overall |
| --- | --- | --- | --- | --- | --- |
|  | (N=982) | (N=2066) | (N=489) | (N=578) | (N=4115) |
| Age (years) | 50.7 (7.79) | 49.4 (7.93) | 57.2 (9.61) | 55.3 (8.21) | 51.4 (8.64) |
| sex |  |  |  |  |  |
| Male | 377 (38.4%) | 848 (41.0%) | 246 (50.3%) | 102 (17.6%) | 1573 (38.2%) |
| Female | 605 (61.6%) | 1218 (59.0%) | 243 (49.7%) | 476 (82.4%) | 2542 (61.8%) |
| Level of Education |  |  |  |  |  |
| None | 9 (0.9%) | 689 (33.3%) | 0 (0%) | 0 (0%) | 698 (17.0%) |
| Primary school completed | 470 (47.9%) | 811 (39.3%) | 135 (27.6%) | 121 (20.9%) | 1537 (37.4%) |
| Technical/professional school | 128 (13.0%) | 182 (8.8%) | 146 (29.9%) | 165 (28.5%) | 621 (15.1%) |
| Secondary school | 246 (25.1%) | 133 (6.4%) | 47 (9.6%) | 168 (29.1%) | 594 (14.4%) |
| Longer education (incl. University deg.) | 127 (12.9%) | 234 (11.3%) | 101 (20.7%) | 124 (21.5%) | 586 (14.2%) |
| Missing | 2 (0.2%) | 17 (0.8%) | 60 (12.3%) | 0 (0%) | 79 (1.9%) |
| BMI (kg/m2) | 25.7 (4.02) | 28.3 (4.37) | 25.4 (3.68) | 25.5 (3.73) | 26.9 (4.35) |
| Alcohol consumption (grams/day) | 14.5 (19.4) | 14.5 (22.7) | 8.04 (10.8) | 9.89 (14.2) | 13.1 (19.9) |
| Smoking Status |  |  |  |  |  |
| Never | 461 (46.9%) | 1136 (55.0%) | 244 (49.9%) | 256 (44.3%) | 2097 (51.0%) |
| Former | 271 (27.6%) | 364 (17.6%) | 169 (34.6%) | 180 (31.1%) | 984 (23.9%) |
| Smoker | 250 (25.5%) | 566 (27.4%) | 76 (15.5%) | 142 (24.6%) | 1034 (25.1%) |
| Physical activity (METS recreational and household activity) | 90.8 (59.4) | 94.3 (56.0) | 90.2 (51.0) | 117 (51.6) | 96.0 (56.3) |
| Missing | 1 (0.1%) | 0 (0%) | 5 (1.0%) | 32 (5.5%) | 38 (0.9%) |
| Cambridge physical activity index |  |  |  |  |  |
| Inactive | 237 (24.1%) | 757 (36.6%) | 140 (28.6%) | 42 (7.3%) | 1176 (28.6%) |
| Moderately inactive | 400 (40.7%) | 670 (32.4%) | 161 (32.9%) | 137 (23.7%) | 1368 (33.2%) |
| Moderately active | 190 (19.3%) | 375 (18.2%) | 101 (20.7%) | 127 (22.0%) | 793 (19.3%) |
| Active | 154 (15.7%) | 264 (12.8%) | 82 (16.8%) | 240 (41.5%) | 740 (18.0%) |
| Missing | 1 (0.1%) | 0 (0%) | 5 (1.0%) | 32 (5.5%) | 38 (0.9%) |
| Healthy score for diet (range 0-54) | 27.1 (6.61) | 30.3 (5.94) | 24.6 (6.73) | 27.2 (6.41) | 28.4 (6.59) |
| Missing | 20 (2.0%) | 42 (2.0%) | 9 (1.8%) | 11 (1.9%) | 82 (2.0%) |
| Healthy lifestyle index (range 0 - 20) | 11.2 (3.37) | 11.9 (3.45) | 12.2 (3.00) | 12.7 (3.09) | 11.9 (3.37) |
| Missing | 21 (2.1%) | 42 (2.0%) | 14 (2.9%) | 43 (7.4%) | 120 (2.9%) |
| InterAct prevalent diabetes reported |  |  |  |  |  |
| No | 957 (97.5%) | 1927 (93.3%) | 476 (97.3%) | 561 (97.1%) | 3921 (95.3%) |
| Yes | 15 (1.5%) | 109 (5.3%) | 13 (2.7%) | 13 (2.2%) | 150 (3.6%) |
| Missing | 10 (1.0%) | 30 (1.5%) | 0 (0%) | 4 (0.7%) | 44 (1.1%) |
| Prevalent MI/Stroke reported |  |  |  |  |  |
| No | 982 (100%) | 2066 (100%) | 489 (100%) | 578 (100%) | 4115 (100%) |
| Yes | 0 (0%) | 0 (0%) | 0 (0%) | 0 (0%) | 0 (0%) |
| Mortality status |  |  |  |  |  |
| Non-case | 938 (95.5%) | 1897 (91.8%) | 376 (76.9%) | 511 (88.4%) | 3722 (90.4%) |
| Incident | 44 (4.5%) | 169 (8.2%) | 113 (23.1%) | 67 (11.6%) | 393 (9.6%) |
| Mortality follow up time (years) | 15.8 (2.65) | 18.5 (2.36) | 16.7 (3.46) | 16.7 (2.56) | 17.4 (2.85) |
| Any first CVD event (CHD/Stroke) (fatal/non-fatal) |  |  |  |  |  |
| Non-case | 960 (97.8%) | 1975 (95.6%) | 443 (90.6%) | 545 (94.3%) | 3923 (95.3%) |
| Incident | 22 (2.2%) | 91 (4.4%) | 46 (9.4%) | 33 (5.7%) | 192 (4.7%) |
| Cardiovascular disease follow up time (years) | 10.5 (2.42) | 14.0 (2.15) | 10.7 (2.14) | 11.9 (2.12) | 12.5 (2.72) |
| Type 2 diabetes status |  |  |  |  |  |
| Non-case | 947 (96.4%) | 1893 (91.6%) | 483 (98.8%) | 556 (96.2%) | 3879 (94.3%) |
| Incident | 25 (2.5%) | 143 (6.9%) | 6 (1.2%) | 18 (3.1%) | 192 (4.7%) |
| Missing | 10 (1.0%) | 30 (1.5%) | 0 (0%) | 4 (0.7%) | 44 (1.1%) |
| Type 2 diabetes follow up time (years) | 10.7 (1.93) | 12.9 (2.06) | 11.1 (1.81) | 12.0 (2.00) | 12.0 (2.21) |
| Missing | 10 (1.0%) | 30 (1.5%) | 0 (0%) | 4 (0.7%) | 44 (1.1%) |
| Any malignant cancer |  |  |  |  |  |
| Non-case | 884 (90.0%) | 1876 (90.8%) | 424 (86.7%) | 530 (91.7%) | 3714 (90.3%) |
| Incident | 98 (10.0%) | 190 (9.2%) | 65 (13.3%) | 48 (8.3%) | 401 (9.7%) |
| Cancer follow up time (years) | 14.2 (3.00) | 16.1 (2.72) | 14.7 (3.74) | 14.5 (2.82) | 15.2 (3.06) |
| Neurodegenerative disease event |  |  |  |  |  |
| Non-case | 972 (99.0%) | 1962 (95.0%) | 484 (99.0%) | 571 (98.8%) | 3989 (96.9%) |
| Incident | 10 (1.0%) | 104 (5.0%) | 5 (1.0%) | 7 (1.2%) | 126 (3.1%) |

**Subcohort used as comparator in case-cohort analyses for mortality, cancers, type 2 diabetes and cardiovascular diseases*

*Continuous variables presented as mean (standard deviation)*

**Table S2: Characteristics of the mortality case sample.**

|  | Italy | Spain | United Kingdom | The Netherlands | Overall |
| --- | --- | --- | --- | --- | --- |
|  | (N=1104) | (N=1521) | (N=2161) | (N=1262) | (N=6048) |
| Age (years) | 55.8 (7.65) | 55.5 (7.65) | 64.8 (8.04) | 59.3 (7.38) | 59.7 (8.75) |
| sex |  |  |  |  |  |
| Male | 498 (45.1%) | 911 (59.9%) | 1251 (57.9%) | 277 (21.9%) | 2937 (48.6%) |
| Female | 606 (54.9%) | 610 (40.1%) | 910 (42.1%) | 985 (78.1%) | 3111 (51.4%) |
| Level of Education |  |  |  |  |  |
| None | 40 (3.6%) | 650 (42.7%) | 0 (0%) | 0 (0%) | 690 (11.4%) |
| Primary school completed | 620 (56.2%) | 535 (35.2%) | 733 (33.9%) | 377 (29.9%) | 2265 (37.5%) |
| Technical/professional school | 114 (10.3%) | 110 (7.2%) | 602 (27.9%) | 395 (31.3%) | 1221 (20.2%) |
| Secondary school | 218 (19.7%) | 91 (6.0%) | 165 (7.6%) | 325 (25.8%) | 799 (13.2%) |
| Longer education (incl. University deg.) | 110 (10.0%) | 126 (8.3%) | 278 (12.9%) | 162 (12.8%) | 676 (11.2%) |
| Missing | 2 (0.2%) | 9 (0.6%) | 383 (17.7%) | 3 (0.2%) | 397 (6.6%) |
| BMI (kg/m2) | 27.0 (4.67) | 29.4 (4.60) | 26.2 (4.23) | 26.1 (4.28) | 27.1 (4.62) |
| Alcohol consumption (grams/day) | 16.4 (20.8) | 21.0 (30.6) | 8.45 (13.0) | 10.7 (18.0) | 13.5 (21.6) |
| Smoking Status |  |  |  |  |  |
| Never | 418 (37.9%) | 659 (43.3%) | 814 (37.7%) | 421 (33.4%) | 2312 (38.2%) |
| Former | 296 (26.8%) | 275 (18.1%) | 980 (45.3%) | 370 (29.3%) | 1921 (31.8%) |
| Smoker | 390 (35.3%) | 587 (38.6%) | 367 (17.0%) | 471 (37.3%) | 1815 (30.0%) |
| Physical activity (METS recreational and household activity) | 84.4 (59.1) | 80.1 (54.0) | 87.6 (48.6) | 111 (54.6) | 89.7 (54.4) |
| Missing | 0 (0%) | 0 (0%) | 13 (0.6%) | 81 (6.4%) | 94 (1.6%) |
| Cambridge physical activity index |  |  |  |  |  |
| Inactive | 392 (35.5%) | 554 (36.4%) | 1057 (48.9%) | 165 (13.1%) | 2168 (35.8%) |
| Moderately inactive | 409 (37.0%) | 538 (35.4%) | 586 (27.1%) | 333 (26.4%) | 1866 (30.9%) |
| Moderately active | 164 (14.9%) | 252 (16.6%) | 312 (14.4%) | 279 (22.1%) | 1007 (16.7%) |
| Active | 139 (12.6%) | 177 (11.6%) | 193 (8.9%) | 404 (32.0%) | 913 (15.1%) |
| Missing | 0 (0%) | 0 (0%) | 13 (0.6%) | 81 (6.4%) | 94 (1.6%) |
| Healthy score for diet (range 0-54) | 27.4 (7.05) | 30.5 (6.16) | 23.8 (6.72) | 25.7 (6.35) | 26.5 (7.08) |
| Missing | 27 (2.4%) | 48 (3.2%) | 43 (2.0%) | 29 (2.3%) | 147 (2.4%) |
| Healthy lifestyle index (range 0 - 20) | 10.5 (3.54) | 10.7 (3.64) | 11.7 (2.97) | 11.7 (3.08) | 11.2 (3.32) |
| Missing | 27 (2.4%) | 48 (3.2%) | 55 (2.5%) | 108 (8.6%) | 238 (3.9%) |
| InterAct prevalent diabetes reported | |  |  |  |  |
| No | 960 (87.0%) | 1320 (86.8%) | 1849 (85.6%) | 1171 (92.8%) | 5300 (87.6%) |
| Yes | 68 (6.2%) | 154 (10.1%) | 117 (5.4%) | 67 (5.3%) | 406 (6.7%) |
| Missing | 76 (6.9%) | 47 (3.1%) | 195 (9.0%) | 24 (1.9%) | 342 (5.7%) |
| Prevalent MI/Stroke reported |  |  |  |  |  |
| No | 1104 (100%) | 1521 (100%) | 2161 (100%) | 1262 (100%) | 6048 (100%) |
| Yes | 0 (0%) | 0 (0%) | 0 (0%) | 0 (0%) | 0 (0%) |
| Mortality status |  |  |  |  |  |
| Non-case | 0 (0%) | 0 (0%) | 0 (0%) | 0 (0%) | 0 (0%) |
| Incident | 0 (0%) | 0 (0%) | 0 (0%) | 0 (0%) | 0 (0%) |
| Mortality follow up time (years) | 1104 (100%) | 1521 (100%) | 2161 (100%) | 1262 (100%) | 6048 (100%) |
| Follow up time deaths (yrs) | 10.4 (4.43) | 12.8 (5.03) | 11.7 (4.91) | 11.7 (4.59) | 11.8 (4.86) |

Continuous variables presented as mean (standard deviation)

**Table S3: Characteristics of the cardiovascular disease case sample.**

|  | Italy | Spain | United Kingdom | The Netherlands | Overall |
| --- | --- | --- | --- | --- | --- |
|  | (N=333) | (N=591) | (N=788) | (N=496) | (N=2208) |
| Age (years) | 55.6 (7.22) | 55.4 (7.36) | 64.1 (8.15) | 58.2 (7.48) | 59.2 (8.56) |
| sex |  |  |  |  |  |
| Male | 171 (51.4%) | 396 (67.0%) | 505 (64.1%) | 154 (31.0%) | 1226 (55.5%) |
| Female | 162 (48.6%) | 195 (33.0%) | 283 (35.9%) | 342 (69.0%) | 982 (44.5%) |
| Level of Education |  |  |  |  |  |
| None | 11 (3.3%) | 248 (42.0%) | 0 (0%) | 0 (0%) | 259 (11.7%) |
| Primary school completed | 190 (57.1%) | 218 (36.9%) | 265 (33.6%) | 136 (27.4%) | 809 (36.6%) |
| Technical/professional school | 39 (11.7%) | 46 (7.8%) | 228 (28.9%) | 175 (35.3%) | 488 (22.1%) |
| Secondary school | 54 (16.2%) | 30 (5.1%) | 75 (9.5%) | 124 (25.0%) | 283 (12.8%) |
| Longer education (incl. University deg.) | 39 (11.7%) | 44 (7.4%) | 87 (11.0%) | 59 (11.9%) | 229 (10.4%) |
| Missing | 0 (0%) | 5 (0.8%) | 133 (16.9%) | 2 (0.4%) | 140 (6.3%) |
| BMI (kg/m2) | 27.1 (4.06) | 29.3 (3.83) | 26.6 (4.00) | 26.2 (4.09) | 27.3 (4.18) |
| Alcohol consumption (grams/day) | 18.2 (22.0) | 21.1 (29.0) | 8.06 (13.7) | 11.3 (18.5) | 13.8 (21.7) |
| Smoking Status |  |  |  |  |  |
| Never | 123 (36.9%) | 257 (43.5%) | 287 (36.4%) | 149 (30.0%) | 816 (37.0%) |
| Former | 81 (24.3%) | 104 (17.6%) | 369 (46.8%) | 163 (32.9%) | 717 (32.5%) |
| Smoker | 129 (38.7%) | 230 (38.9%) | 132 (16.8%) | 184 (37.1%) | 675 (30.6%) |
| Physical activity (METS recreational and household activity) | 87.2 (60.5) | 75.0 (54.3) | 85.8 (49.7) | 109 (53.3) | 88.1 (54.8) |
| Missing | 0 (0%) | 0 (0%) | 5 (0.6%) | 39 (7.9%) | 44 (2.0%) |
| Cambridge physical activity index |  |  |  |  |  |
| Inactive | 98 (29.4%) | 205 (34.7%) | 404 (51.3%) | 61 (12.3%) | 768 (34.8%) |
| Moderately inactive | 124 (37.2%) | 203 (34.3%) | 185 (23.5%) | 139 (28.0%) | 651 (29.5%) |
| Moderately active | 63 (18.9%) | 112 (19.0%) | 118 (15.0%) | 103 (20.8%) | 396 (17.9%) |
| Active | 48 (14.4%) | 71 (12.0%) | 76 (9.6%) | 154 (31.0%) | 349 (15.8%) |
| Missing | 0 (0%) | 0 (0%) | 5 (0.6%) | 39 (7.9%) | 44 (2.0%) |
| Healthy score for diet (range 0-54) | 27.9 (7.06) | 30.8 (6.06) | 23.3 (6.25) | 25.9 (6.46) | 26.6 (7.03) |
| Missing | 14 (4.2%) | 21 (3.6%) | 19 (2.4%) | 15 (3.0%) | 69 (3.1%) |
| Healthy lifestyle index (range 0 - 20) | 10.4 (3.53) | 10.5 (3.47) | 11.5 (2.89) | 11.6 (3.04) | 11.1 (3.23) |
| Missing | 14 (4.2%) | 21 (3.6%) | 24 (3.0%) | 51 (10.3%) | 110 (5.0%) |
| InterAct prevalent diabetes reported |  |  |  |  |  |
| No | 282 (84.7%) | 497 (84.1%) | 655 (83.1%) | 462 (93.1%) | 1896 (85.9%) |
| Yes | 31 (9.3%) | 78 (13.2%) | 68 (8.6%) | 28 (5.6%) | 205 (9.3%) |
| Missing | 20 (6.0%) | 16 (2.7%) | 65 (8.2%) | 6 (1.2%) | 107 (4.8%) |
| Prevalent MI/Stroke reported |  |  |  |  |  |
| No | 333 (100%) | 591 (100%) | 788 (100%) | 496 (100%) | 2208 (100%) |
| Yes | 0 (0%) | 0 (0%) | 0 (0%) | 0 (0%) | 0 (0%) |
| Any first Coronary Heart Disease event (I20-I25) (fatal/non-fatal) | |  |  |  |  |
| Non-case | 124 (37.2%) | 261 (44.2%) | 145 (18.4%) | 147 (29.6%) | 677 (30.7%) |
| Incident | 209 (62.8%) | 330 (55.8%) | 643 (81.6%) | 349 (70.4%) | 1531 (69.3%) |
| Coronary Heart Disease follow up time (years) | 7.74 (3.67) | 10.6 (4.36) | 7.19 (3.18) | 8.15 (3.91) | 8.40 (4.01) |
| Any first stroke event (I60,I61,I63,I64) (fatal/non-fatal) | |  |  |  |  |
| Non-case | 199 (59.8%) | 305 (51.6%) | 598 (75.9%) | 317 (63.9%) | 1419 (64.3%) |
| Incident | 134 (40.2%) | 286 (48.4%) | 190 (24.1%) | 179 (36.1%) | 789 (35.7%) |
| Stroke follow up time (years) | 9.24 (3.70) | 11.2 (4.30) | 9.06 (3.23) | 9.99 (3.66) | 9.88 (3.81) |

| *Continuous variables presented as mean (standard deviation)* |
| --- |

***Table S4: Characteristics of the type 2 diabetes case sample.***

|  | Italy | Spain | United.Kingdom | The.Netherlands | Overall |
| --- | --- | --- | --- | --- | --- |
|  | (N=253) | (N=580) | (N=157) | (N=154) | (N=1144) |
| Age (years) | 54.2 (7.30) | 53.9 (7.23) | 60.9 (8.31) | 58.6 (6.65) | 55.6 (7.77) |
| sex |  |  |  |  |  |
| Male | 120 (47.4%) | 355 (61.2%) | 100 (63.7%) | 34 (22.1%) | 609 (53.2%) |
| Female | 133 (52.6%) | 225 (38.8%) | 57 (36.3%) | 120 (77.9%) | 535 (46.8%) |
| Level of Education |  |  |  |  |  |
| None | 9 (3.6%) | 271 (46.7%) | 0 (0%) | 0 (0%) | 280 (24.5%) |
| Primary school completed | 154 (60.9%) | 213 (36.7%) | 56 (35.7%) | 52 (33.8%) | 475 (41.5%) |
| Technical/professional school | 22 (8.7%) | 32 (5.5%) | 47 (29.9%) | 58 (37.7%) | 159 (13.9%) |
| Secondary school | 46 (18.2%) | 32 (5.5%) | 10 (6.4%) | 32 (20.8%) | 120 (10.5%) |
| Longer education (incl. University deg.) | 22 (8.7%) | 26 (4.5%) | 23 (14.6%) | 11 (7.1%) | 82 (7.2%) |
| Missing | 0 (0%) | 6 (1.0%) | 21 (13.4%) | 1 (0.6%) | 28 (2.4%) |
| BMI (kg/m2) | 29.9 (4.92) | 31.2 (4.45) | 29.0 (5.19) | 29.6 (4.56) | 30.4 (4.75) |
| Alcohol consumption (grams/day) | 12.4 (17.2) | 21.7 (32.7) | 9.86 (16.2) | 7.89 (12.9) | 16.1 (26.4) |
| Smoking Status |  |  |  |  |  |
| Never | 102 (40.3%) | 267 (46.0%) | 58 (36.9%) | 66 (42.9%) | 493 (43.1%) |
| Former | 68 (26.9%) | 106 (18.3%) | 78 (49.7%) | 50 (32.5%) | 302 (26.4%) |
| Smoker | 83 (32.8%) | 207 (35.7%) | 21 (13.4%) | 38 (24.7%) | 349 (30.5%) |
| Physical activity (METS recreational and household activity) | 84.4 (60.1) | 81.1 (55.1) | 80.3 (45.7) | 113 (56.8) | 85.7 (56.2) |
| Missing | 0 (0%) | 0 (0%) | 1 (0.6%) | 13 (8.4%) | 14 (1.2%) |
| Cambridge physical activity index |  |  |  |  |  |
| Inactive | 99 (39.1%) | 216 (37.2%) | 77 (49.0%) | 29 (18.8%) | 421 (36.8%) |
| Moderately inactive | 87 (34.4%) | 187 (32.2%) | 40 (25.5%) | 37 (24.0%) | 351 (30.7%) |
| Moderately active | 33 (13.0%) | 106 (18.3%) | 18 (11.5%) | 32 (20.8%) | 189 (16.5%) |
| Active | 34 (13.4%) | 71 (12.2%) | 21 (13.4%) | 43 (27.9%) | 169 (14.8%) |
| Missing | 0 (0%) | 0 (0%) | 1 (0.6%) | 13 (8.4%) | 14 (1.2%) |
| Healthy score for diet (range 0-54) | 28.1 (7.07) | 31.2 (6.05) | 23.2 (6.82) | 25.4 (6.11) | 28.7 (7.05) |
| Missing | 4 (1.6%) | 10 (1.7%) | 4 (2.5%) | 5 (3.2%) | 23 (2.0%) |
| Healthy lifestyle index (range 0 - 20) | 10.2 (3.18) | 10.6 (3.64) | 10.5 (2.79) | 11.1 (3.15) | 10.6 (3.38) |
| Missing | 4 (1.6%) | 10 (1.7%) | 5 (3.2%) | 17 (11.0%) | 36 (3.1%) |
| InterAct prevalent diabetes reported |  |  |  |  |  |
| No | 253 (100%) | 580 (100%) | 157 (100%) | 154 (100%) | 1144 (100%) |
| Yes | 0 (0%) | 0 (0%) | 0 (0%) | 0 (0%) | 0 (0%) |
| Prevalent MI/Stroke reported |  |  |  |  |  |
| No | 253 (100%) | 580 (100%) | 157 (100%) | 154 (100%) | 1144 (100%) |
| Yes | 0 (0%) | 0 (0%) | 0 (0%) | 0 (0%) | 0 (0%) |
| Type 2 diabetes follow up time (years) | 6.50 (2.86) | 8.13 (3.09) | 6.28 (2.67) | 5.36 (2.83) | 7.14 (3.13) |

| *Continuous variables presented as mean (standard deviation)* |
| --- |

***Table S4: Characteristics of the cancer case sample.***

|  | Italy | Spain | United Kingdom | The Netherlands | Overall |
| --- | --- | --- | --- | --- | --- |
|  | (N=1935) | (N=1602) | (N=1483) | (N=1125) | (N=6145) |
| Age (years) | 53.9 (7.51) | 53.1 (7.78) | 60.6 (8.99) | 56.8 (7.07) | 55.8 (8.42) |
| sex |  |  |  |  |  |
| Male | 760 (39.3%) | 946 (59.1%) | 864 (58.3%) | 256 (22.8%) | 2826 (46.0%) |
| Female | 1175 (60.7%) | 656 (40.9%) | 619 (41.7%) | 869 (77.2%) | 3319 (54.0%) |
| Level of Education |  |  |  |  |  |
| None | 37 (1.9%) | 597 (37.3%) | 0 (0%) | 0 (0%) | 634 (10.3%) |
| Primary school completed | 1043 (53.9%) | 615 (38.4%) | 352 (23.7%) | 262 (23.3%) | 2272 (37.0%) |
| Technical/professional school | 213 (11.0%) | 122 (7.6%) | 446 (30.1%) | 368 (32.7%) | 1149 (18.7%) |
| Secondary school | 425 (22.0%) | 108 (6.7%) | 136 (9.2%) | 299 (26.6%) | 968 (15.8%) |
| Longer education (incl. University deg.) | 214 (11.1%) | 147 (9.2%) | 269 (18.1%) | 195 (17.3%) | 825 (13.4%) |
| Missing | 3 (0.2%) | 13 (0.8%) | 280 (18.9%) | 1 (0.1%) | 297 (4.8%) |
| BMI (kg/m2) | 26.4 (4.18) | 28.8 (4.25) | 26.1 (3.88) | 26.0 (4.02) | 26.9 (4.26) |
| Alcohol consumption (grams/day) | 15.4 (19.1) | 20.2 (28.6) | 8.89 (12.3) | 11.8 (15.8) | 14.4 (20.7) |
| Smoking Status |  |  |  |  |  |
| Never | 852 (44.0%) | 719 (44.9%) | 614 (41.4%) | 403 (35.8%) | 2588 (42.1%) |
| Former | 525 (27.1%) | 313 (19.5%) | 626 (42.2%) | 374 (33.2%) | 1838 (29.9%) |
| Smoker | 558 (28.8%) | 570 (35.6%) | 243 (16.4%) | 348 (30.9%) | 1719 (28.0%) |
| Physical activity (METS recreational and household activity) | 89.8 (59.2) | 82.3 (54.3) | 88.3 (47.8) | 115 (55.8) | 91.8 (55.8) |
| Missing | 0 (0%) | 0 (0%) | 9 (0.6%) | 83 (7.4%) | 92 (1.5%) |
| Cambridge physical activity index |  |  |  |  |  |
| Inactive | 605 (31.3%) | 566 (35.3%) | 565 (38.1%) | 106 (9.4%) | 1842 (30.0%) |
| Moderately inactive | 732 (37.8%) | 528 (33.0%) | 438 (29.5%) | 281 (25.0%) | 1979 (32.2%) |
| Moderately active | 312 (16.1%) | 325 (20.3%) | 287 (19.4%) | 260 (23.1%) | 1184 (19.3%) |
| Active | 286 (14.8%) | 183 (11.4%) | 184 (12.4%) | 395 (35.1%) | 1048 (17.1%) |
| Missing | 0 (0%) | 0 (0%) | 9 (0.6%) | 83 (7.4%) | 92 (1.5%) |
| Healthy score for diet (range 0-54) | 27.0 (6.92) | 30.4 (6.02) | 24.2 (6.68) | 26.3 (6.35) | 27.1 (6.90) |
| Missing | 45 (2.3%) | 37 (2.3%) | 25 (1.7%) | 15 (1.3%) | 122 (2.0%) |
| Healthy lifestyle index (range 0 - 20) | 10.8 (3.45) | 10.9 (3.56) | 11.8 (3.01) | 11.9 (3.03) | 11.3 (3.34) |
| Missing | 45 (2.3%) | 37 (2.3%) | 33 (2.2%) | 98 (8.7%) | 213 (3.5%) |
| InterAct prevalent diabetes reported |  |  |  |  |  |
| No | 1820 (94.1%) | 1473 (91.9%) | 1291 (87.1%) | 1078 (95.8%) | 5662 (92.1%) |
| Yes | 63 (3.3%) | 103 (6.4%) | 37 (2.5%) | 35 (3.1%) | 238 (3.9%) |
| Missing | 52 (2.7%) | 26 (1.6%) | 155 (10.5%) | 12 (1.1%) | 245 (4.0%) |
| Prevalent MI/Stroke reported |  |  |  |  |  |
| No | 1935 (100%) | 1602 (100%) | 1483 (100%) | 1125 (100%) | 6145 (100%) |
| Yes | 0 (0%) | 0 (0%) | 0 (0%) | 0 (0%) | 0 (0%) |
| Any malignant cancer |  |  |  |  |  |
| Non-case | 0 (0%) | 0 (0%) | 0 (0%) | 0 (0%) | 0 (0%) |
| Incident | 1935 (100%) | 1602 (100%) | 1483 (100%) | 1125 (100%) | 6145 (100%) |
| Bladder malignant cancer |  |  |  |  |  |
| Non-case | 1874 (96.8%) | 1506 (94.0%) | 1429 (96.4%) | 1102 (98.0%) | 5911 (96.2%) |
| Incident | 61 (3.2%) | 96 (6.0%) | 54 (3.6%) | 23 (2.0%) | 234 (3.8%) |
| Breast malignant cancer |  |  |  |  |  |
| Non-case | 1516 (78.3%) | 1420 (88.6%) | 1404 (94.7%) | 887 (78.8%) | 5227 (85.1%) |
| Incident | 419 (21.7%) | 182 (11.4%) | 79 (5.3%) | 238 (21.2%) | 918 (14.9%) |
| Peri-menopausal (at blood coll.) breast cancer | |  |  |  |  |
| Non-case | 1850 (95.6%) | 1586 (99.0%) | 1461 (98.5%) | 1071 (95.2%) | 5968 (97.1%) |
| Incident | 85 (4.4%) | 16 (1.0%) | 22 (1.5%) | 54 (4.8%) | 177 (2.9%) |
| Post-menopausal (at blood coll.) breast cancer | |  |  |  |  |
| Non-case | 1743 (90.1%) | 1534 (95.8%) | 1450 (97.8%) | 986 (87.6%) | 5713 (93.0%) |
| Incident | 192 (9.9%) | 68 (4.2%) | 33 (2.2%) | 139 (12.4%) | 432 (7.0%) |
| Pre-menopausal (at blood coll.) breast cancer | |  |  |  |  |
| Non-case | 1793 (92.7%) | 1504 (93.9%) | 1459 (98.4%) | 1080 (96.0%) | 5836 (95.0%) |
| Incident | 142 (7.3%) | 98 (6.1%) | 24 (1.6%) | 45 (4.0%) | 309 (5.0%) |
| Colon-rectum malignant cancer |  |  |  |  |  |
| Non-case | 1672 (86.4%) | 1354 (84.5%) | 1242 (83.7%) | 936 (83.2%) | 5204 (84.7%) |
| Incident | 263 (13.6%) | 248 (15.5%) | 241 (16.3%) | 189 (16.8%) | 941 (15.3%) |
| Colon cancer |  |  |  |  |  |
| Non-case | 1745 (90.2%) | 1454 (90.8%) | 1325 (89.3%) | 995 (88.4%) | 5519 (89.8%) |
| Incident | 190 (9.8%) | 148 (9.2%) | 158 (10.7%) | 130 (11.6%) | 626 (10.2%) |
| Rectum cancer |  |  |  |  |  |
| Non-case | 1862 (96.2%) | 1502 (93.8%) | 1400 (94.4%) | 1066 (94.8%) | 5830 (94.9%) |
| Incident | 73 (3.8%) | 100 (6.2%) | 83 (5.6%) | 59 (5.2%) | 315 (5.1%) |
| Endometrial malignant cancer |  |  |  |  |  |
| Non-case | 1839 (95.0%) | 1545 (96.4%) | 1434 (96.7%) | 1067 (94.8%) | 5885 (95.8%) |
| Incident | 96 (5.0%) | 57 (3.6%) | 49 (3.3%) | 58 (5.2%) | 260 (4.2%) |
| Glioma malignant cancer |  |  |  |  |  |
| Non-case | 1910 (98.7%) | 1572 (98.1%) | 1458 (98.3%) | 1110 (98.7%) | 6050 (98.5%) |
| Incident | 25 (1.3%) | 30 (1.9%) | 25 (1.7%) | 15 (1.3%) | 95 (1.5%) |
| Kidney malignant cancer |  |  |  |  |  |
| Non-case | 1874 (96.8%) | 1553 (96.9%) | 1445 (97.4%) | 1106 (98.3%) | 5978 (97.3%) |
| Incident | 61 (3.2%) | 49 (3.1%) | 38 (2.6%) | 19 (1.7%) | 167 (2.7%) |
| Liver malignant cancer |  |  |  |  |  |
| Non-case | 1906 (98.5%) | 1573 (98.2%) | 1471 (99.2%) | 1116 (99.2%) | 6066 (98.7%) |
| Incident | 29 (1.5%) | 29 (1.8%) | 12 (0.8%) | 9 (0.8%) | 79 (1.3%) |
| Lung malignant cancer |  |  |  |  |  |
| Non-case | 1775 (91.7%) | 1475 (92.1%) | 1363 (91.9%) | 1014 (90.1%) | 5627 (91.6%) |
| Incident | 160 (8.3%) | 127 (7.9%) | 120 (8.1%) | 111 (9.9%) | 518 (8.4%) |
| Lymphoma malignant |  |  |  |  |  |
| Non-case | 1777 (91.8%) | 1499 (93.6%) | 1368 (92.2%) | 1053 (93.6%) | 5697 (92.7%) |
| Incident | 158 (8.2%) | 103 (6.4%) | 115 (7.8%) | 72 (6.4%) | 448 (7.3%) |
| Melanoma malignant cancer |  |  |  |  |  |
| Non-case | 1865 (96.4%) | 1567 (97.8%) | 1387 (93.5%) | 1056 (93.9%) | 5875 (95.6%) |
| Incident | 70 (3.6%) | 35 (2.2%) | 96 (6.5%) | 69 (6.1%) | 270 (4.4%) |
| Ovary malignant cancer |  |  |  |  |  |
| Non-case | 1879 (97.1%) | 1559 (97.3%) | 1433 (96.6%) | 1081 (96.1%) | 5952 (96.9%) |
| Incident | 56 (2.9%) | 43 (2.7%) | 50 (3.4%) | 44 (3.9%) | 193 (3.1%) |
| Pancreas malignant cancer |  |  |  |  |  |
| Non-case | 1896 (98.0%) | 1559 (97.3%) | 1447 (97.6%) | 1087 (96.6%) | 5989 (97.5%) |
| Incident | 39 (2.0%) | 43 (2.7%) | 36 (2.4%) | 38 (3.4%) | 156 (2.5%) |
| Prostate malignant cancer |  |  |  |  |  |
| Non-case | 1710 (88.4%) | 1295 (80.8%) | 1189 (80.2%) | 1048 (93.2%) | 5242 (85.3%) |
| Incident | 225 (11.6%) | 307 (19.2%) | 294 (19.8%) | 77 (6.8%) | 903 (14.7%) |
| Stomach malignant cancer |  |  |  |  |  |
| Non-case | 1851 (95.7%) | 1533 (95.7%) | 1449 (97.7%) | 1097 (97.5%) | 5930 (96.5%) |
| Incident | 84 (4.3%) | 69 (4.3%) | 34 (2.3%) | 28 (2.5%) | 215 (3.5%) |
| Thyroid malignant cancer |  |  |  |  |  |
| Non-case | 1870 (96.6%) | 1572 (98.1%) | 1475 (99.5%) | 1121 (99.6%) | 6038 (98.3%) |
| Incident | 65 (3.4%) | 30 (1.9%) | 8 (0.5%) | 4 (0.4%) | 107 (1.7%) |
| Upper aero-digestive tract malignant cancer | |  |  |  |  |
| Non-case | 1890 (97.7%) | 1525 (95.2%) | 1423 (96.0%) | 1075 (95.6%) | 5913 (96.2%) |
| Incident | 45 (2.3%) | 77 (4.8%) | 60 (4.0%) | 50 (4.4%) | 232 (3.8%) |
| Cancer follow-up time (years) | 8.63 (4.29) | 10.4 (4.59) | 9.27 (4.60) | 9.39 (4.19) | 9.38 (4.48) |

| *Continuous variables presented as mean (standard deviation)* |
| --- |

***Table S6: Characteristics of the subcohort selected as comparator for the Dementia/ Alzheimer's disease case-cohort analysis.***

|  | Spain | Overall |
| --- | --- | --- |
|  | (N=1894) | (N=1894) |
| Age (years) | 49.8 (8.01) | 49.8 (8.01) |
| sex |  |  |
| Male | 717 (37.9%) | 717 (37.9%) |
| Female | 1177 (62.1%) | 1177 (62.1%) |
| Level of Education |  |  |
| None | 679 (35.9%) | 679 (35.9%) |
| Primary school completed | 738 (39.0%) | 738 (39.0%) |
| Technical/professional school | 141 (7.4%) | 141 (7.4%) |
| Secondary school | 109 (5.8%) | 109 (5.8%) |
| Longer education (incl. University deg.) | 214 (11.3%) | 214 (11.3%) |
| Missing | 13 (0.7%) | 13 (0.7%) |
| BMI (kg/m2) | 28.4 (4.45) | 28.4 (4.45) |
| Alcohol consumption (grams/day) | 13.6 (22.0) | 13.6 (22.0) |
| Smoking Status |  |  |
| Never | 1068 (56.4%) | 1068 (56.4%) |
| Former | 326 (17.2%) | 326 (17.2%) |
| Smoker | 500 (26.4%) | 500 (26.4%) |
| Physical activity (METS recreational and household activity) | 96.2 (56.2) | 96.2 (56.2) |
| Cambridge physical activity index | |  |
| Inactive | 717 (37.9%) | 717 (37.9%) |
| Moderately inactive | 611 (32.3%) | 611 (32.3%) |
| Moderately active | 337 (17.8%) | 337 (17.8%) |
| Active | 229 (12.1%) | 229 (12.1%) |
| Missing | 0 (0%) | 0 (0%) |
| Healthy score for diet (range 0-54) | 30.9 (5.88) | 30.9 (5.88) |
| Missing | 40 (2.1%) | 40 (2.1%) |
| Healthy lifestyle index (range 0 - 20) | 12.1 (3.39) | 12.1 (3.39) |
| Missing | 42 (2.2%) | 42 (2.2%) |
| Prevalent MI/Stroke reported |  |  |
| No | 1834 (96.8%) | 1834 (96.8%) |
| Yes | 60 (3.2%) | 60 (3.2%) |
| InterAct prevalent diabetes reported | |  |
| No | 1742 (92.0%) | 1742 (92.0%) |
| Yes | 118 (6.2%) | 118 (6.2%) |
| Missing | 34 (1.8%) | 34 (1.8%) |
| Alzheimer’s disease |  |  |
| Non-case | 1811 (95.6%) | 1811 (95.6%) |
| Incident | 83 (4.4%) | 83 (4.4%) |
| Alzheimer’s disease Follow up time (yrs) | 21.8 (3.80) | 21.8 (3.80) |
| Dementia |  |  |
| Non-case | 1779 (93.9%) | 1779 (93.9%) |
| Incident | 115 (6.1%) | 115 (6.1%) |
| Dementia Follow up time (yrs) | 21.9 (3.82) | 21.9 (3.82) |
| Death event |  |  |
| Non-case | 1729 (91.3%) | 1729 (91.3%) |
| Incident | 165 (8.7%) | 165 (8.7%) |
| Any first CVD event (CHD/Stroke) (fatal/non-fatal) | |  |
| Non-case | 1807 (95.4%) | 1807 (95.4%) |
| Incident | 87 (4.6%) | 87 (4.6%) |
| Type 2 diabetes status |  |  |
| Non-case | 1727 (91.2%) | 1727 (91.2%) |
| Incident | 133 (7.0%) | 133 (7.0%) |
| Missing | 34 (1.8%) | 34 (1.8%) |
| Any malignant cancer |  |  |
| Non-case | 1720 (90.8%) | 1720 (90.8%) |
| Incident | 174 (9.2%) | 174 (9.2%) |

**Table S7: Characteristics of the dementia case sample.**

|  | Spain | Overall |
| --- | --- | --- |
|  | (N=1043) | (N=1043) |
| Age (years) | 58.4 (5.56) | 58.4 (5.56) |
| sex |  |  |
| Male | 351 (33.7%) | 351 (33.7%) |
| Female | 692 (66.3%) | 692 (66.3%) |
| Level of Education |  |  |
| None | 628 (60.2%) | 628 (60.2%) |
| Primary school completed | 290 (27.8%) | 290 (27.8%) |
| Technical/professional school | 36 (3.5%) | 36 (3.5%) |
| Secondary school | 33 (3.2%) | 33 (3.2%) |
| Longer education (incl. University deg.) | 45 (4.3%) | 45 (4.3%) |
| Missing | 11 (1.1%) | 11 (1.1%) |
| BMI (kg/m2) | 29.8 (4.18) | 29.8 (4.18) |
| Alcohol consumption (grams/day) | 11.2 (24.8) | 11.2 (24.8) |
| Smoking Status |  |  |
| Never | 759 (72.8%) | 759 (72.8%) |
| Former | 133 (12.8%) | 133 (12.8%) |
| Smoker | 150 (14.4%) | 150 (14.4%) |
| Missing | 1 (0.1%) | 1 (0.1%) |
| Physical activity (METS recreational and household activity) | 105 (56.7) | 105 (56.7) |
| Cambridge physical activity index | |  |
| Inactive | 478 (45.8%) | 478 (45.8%) |
| Moderately inactive | 330 (31.6%) | 330 (31.6%) |
| Moderately active | 149 (14.3%) | 149 (14.3%) |
| Active | 86 (8.2%) | 86 (8.2%) |
| Missing | 0 (0%) | 0 (0%) |
| Healthy score for diet (range 0-54) | 31.4 (5.89) | 31.4 (5.89) |
| Missing | 32 (3.1%) | 32 (3.1%) |
| Healthy lifestyle index (range 0 - 20) | 12.7 (3.06) | 12.7 (3.06) |
| Missing | 38 (3.6%) | 38 (3.6%) |
| Prevalent MI/Stroke reported |  |  |
| No | 1016 (97.4%) | 1016 (97.4%) |
| Yes | 27 (2.6%) | 27 (2.6%) |
| InterAct prevalent diabetes reported | |  |
| No | 876 (84.0%) | 876 (84.0%) |
| Yes | 147 (14.1%) | 147 (14.1%) |
| Missing | 20 (1.9%) | 20 (1.9%) |
| Dementia |  |  |
| Non-case | 0 (0%) | 0 (0%) |
| Incident | 1043 (100%) | 1043 (100%) |
| Dementia Follow up time (yrs) | 18.4 (4.56) | 18.4 (4.56) |
| Alzheimer’s disease |  |  |
| Non-case | 334 (32%) | 334 (32%) |
| Incident | 709 (68%) | 709 (100%) |
| Alzheimer’s disease Follow up time (yrs) | 18.6 (4.51) | 18.6 (4.51) |
| Death event |  |  |
| Non-case | 889 (85.2%) | 889 (85.2%) |
| Incident | 154 (14.8%) | 154 (14.8%) |
| Any first CVD event (CHD/Stroke) (fatal/non-fatal) | |  |
| Non-case | 955 (91.6%) | 955 (91.6%) |
| Incident | 88 (8.4%) | 88 (8.4%) |
| Type 2 diabetes status |  |  |
| Non-case | 926 (88.8%) | 926 (88.8%) |
| Incident | 97 (9.3%) | 97 (9.3%) |
| Missing | 20 (1.9%) | 20 (1.9%) |
| Any malignant cancer |  |  |
| Non-case | 932 (89.4%) | 932 (89.4%) |
| Incident | 111 (10.6%) | 111 (10.6%) |

| *Continuous variables presented as mean (standard deviation)* |
| --- |

***Table S8: Characteristics of the subcohort selected as comparator for the Parkinsons's disease case-cohort analysis.***

|  | Germany | Italy | Spain | The Netherlands | United Kingdom | Overall |
| --- | --- | --- | --- | --- | --- | --- |
|  | (N=99) | (N=948) | (N=1527) | (N=813) | (N=613) | (N=4000) |
| Age (years) | 52.7 (8.22) | 51.4 (7.69) | 49.5 (7.84) | 55.0 (7.97) | 59.3 (9.32) | 52.6 (8.79) |
| sex |  |  |  |  |  |  |
| Male | 52 (52.5%) | 329 (34.7%) | 634 (41.5%) | 119 (14.6%) | 261 (42.6%) | 1395 (34.9%) |
| Female | 47 (47.5%) | 619 (65.3%) | 893 (58.5%) | 694 (85.4%) | 352 (57.4%) | 2605 (65.1%) |
| Level of Education |  |  |  |  |  |  |
| None | 1 (1.0%) | 6 (0.6%) | 489 (32.0%) | 0 (0%) | 0 (0%) | 496 (12.4%) |
| Primary school completed | 24 (24.2%) | 458 (48.3%) | 639 (41.8%) | 164 (20.2%) | 228 (37.2%) | 1513 (37.8%) |
| Technical/professional school | 33 (33.3%) | 134 (14.1%) | 125 (8.2%) | 233 (28.7%) | 196 (32.0%) | 721 (18.0%) |
| Secondary school | 4 (4.0%) | 229 (24.2%) | 90 (5.9%) | 236 (29.0%) | 51 (8.3%) | 610 (15.3%) |
| Longer education (incl. University deg.) | 37 (37.4%) | 108 (11.4%) | 175 (11.5%) | 177 (21.8%) | 63 (10.3%) | 560 (14.0%) |
| Missing | 0 (0%) | 13 (1.4%) | 9 (0.6%) | 3 (0.4%) | 75 (12.2%) | 100 (2.5%) |
| BMI (kg/m2) | 25.5 (4.22) | 25.4 (3.97) | 28.2 (4.40) | 25.5 (3.92) | 25.6 (3.61) | 26.5 (4.28) |
| Alcohol consumption (grams/day) | 16.9 (17.7) | 15.6 (20.0) | 15.6 (23.3) | 10.1 (14.4) | 7.17 (9.58) | 13.2 (19.4) |
| Missing | 0 (0%) | 12 (1.3%) | 0 (0%) | 1 (0.1%) | 2 (0.3%) | 15 (0.4%) |
| Smoking Status |  |  |  |  |  |  |
| Never | 53 (53.5%) | 448 (47.3%) | 821 (53.8%) | 322 (39.6%) | 256 (41.8%) | 1900 (47.5%) |
| Former | 29 (29.3%) | 251 (26.5%) | 270 (17.7%) | 267 (32.8%) | 216 (35.2%) | 1033 (25.8%) |
| Smoker | 16 (16.2%) | 232 (24.5%) | 436 (28.6%) | 220 (27.1%) | 91 (14.8%) | 995 (24.9%) |
| Missing | 1 (1.0%) | 17 (1.8%) | 0 (0%) | 4 (0.5%) | 50 (8.2%) | 72 (1.8%) |
| Physical activity (METS recreational and household activity) | 86.4 (46.6) | 93.6 (58.3) | 92.2 (56.3) | 114 (50.9) | 91.1 (53.2) | 96.6 (55.8) |
| Missing | 0 (0%) | 13 (1.4%) | 0 (0%) | 45 (5.5%) | 52 (8.5%) | 110 (2.8%) |
| Cambridge physical activity index |  |  |  |  |  |  |
| Inactive | 15 (15.2%) | 199 (21.0%) | 522 (34.2%) | 68 (8.4%) | 201 (32.8%) | 1005 (25.1%) |
| Moderately inactive | 34 (34.3%) | 403 (42.5%) | 490 (32.1%) | 201 (24.7%) | 176 (28.7%) | 1304 (32.6%) |
| Moderately active | 27 (27.3%) | 185 (19.5%) | 310 (20.3%) | 191 (23.5%) | 94 (15.3%) | 807 (20.2%) |
| Active | 23 (23.2%) | 148 (15.6%) | 205 (13.4%) | 308 (37.9%) | 90 (14.7%) | 774 (19.4%) |
| Missing | 0 (0%) | 13 (1.4%) | 0 (0%) | 45 (5.5%) | 52 (8.5%) | 110 (2.8%) |
| Healthy score for diet (range 0-54) | 26.6 (6.11) | 26.1 (6.35) | 31.1 (5.75) | 27.2 (6.48) | 23.4 (6.13) | 27.9 (6.74) |
| Missing | 0 (0%) | 31 (3.3%) | 34 (2.2%) | 24 (3.0%) | 15 (2.4%) | 104 (2.6%) |
| Healthy lifestyle index (range 0 - 20) | 11.9 (2.94) | 11.2 (3.39) | 11.9 (3.49) | 12.6 (3.05) | 11.8 (2.69) | 11.9 (3.30) |
| Missing | 1 (1.0%) | 37 (3.9%) | 36 (2.4%) | 86 (10.6%) | 87 (14.2%) | 247 (6.2%) |
| Prevalent MI/Stroke reported |  |  |  |  |  |  |
| No | 93 (93.9%) | 939 (99.1%) | 1480 (96.9%) | 786 (96.7%) | 585 (95.4%) | 3883 (97.1%) |
| Yes | 6 (6.1%) | 9 (0.9%) | 47 (3.1%) | 27 (3.3%) | 28 (4.6%) | 117 (2.9%) |
| InterAct prevalent diabetes reported |  |  |  |  |  |  |
| No | 95 (96.0%) | 927 (97.8%) | 1408 (92.2%) | 792 (97.4%) | 593 (96.7%) | 3815 (95.4%) |
| Yes | 2 (2.0%) | 14 (1.5%) | 88 (5.8%) | 17 (2.1%) | 20 (3.3%) | 141 (3.5%) |
| Missing | 2 (2.0%) | 7 (0.7%) | 31 (2.0%) | 4 (0.5%) | 0 (0%) | 44 (1.1%) |
| Parkinson’s disease |  |  |  |  |  |  |
| Non-case | 95 (96.0%) | 941 (99.3%) | 1522 (99.7%) | 810 (99.6%) | 610 (99.5%) | 3978 (99.5%) |
| Incident | 4 (4.0%) | 7 (0.7%) | 5 (0.3%) | 3 (0.4%) | 3 (0.5%) | 22 (0.6%) |
| Parkinson’s disease Follow up time (yrs) | 15.8 (2.67) | 19.0 (6.51) | 15.9 (1.87) | 16.2 (2.78) | 13.9 (3.06) | 16.4 (4.15) |
| Death event |  |  |  |  |  |  |
| Non-case | 92 (92.9%) | 894 (94.3%) | 1392 (91.2%) | 713 (87.7%) | 436 (71.1%) | 3527 (88.2%) |
| Incident | 7 (7.1%) | 54 (5.7%) | 135 (8.8%) | 100 (12.3%) | 177 (28.9%) | 473 (11.8%) |
| Any first CVD event (CHD/Stroke) (fatal/non-fatal) |  |  |  |  |  |  |
| Non-case | 97 (98.0%) | 929 (98.0%) | 1451 (95.0%) | 758 (93.2%) | 530 (86.5%) | 3765 (94.1%) |
| Incident | 2 (2.0%) | 19 (2.0%) | 76 (5.0%) | 55 (6.8%) | 83 (13.5%) | 235 (5.9%) |
| Type 2 diabetes status |  |  |  |  |  |  |
| Non-case | 92 (92.9%) | 914 (96.4%) | 1385 (90.7%) | 783 (96.3%) | 597 (97.4%) | 3771 (94.3%) |
| Incident | 5 (5.1%) | 27 (2.8%) | 111 (7.3%) | 26 (3.2%) | 16 (2.6%) | 185 (4.6%) |
| Missing | 2 (2.0%) | 7 (0.7%) | 31 (2.0%) | 4 (0.5%) | 0 (0%) | 44 (1.1%) |
| Any malignant cancer |  |  |  |  |  |  |
| Non-case | 93 (93.9%) | 838 (88.4%) | 1387 (90.8%) | 720 (88.6%) | 520 (84.8%) | 3558 (89.0%) |
| Incident | 6 (6.1%) | 110 (11.6%) | 140 (9.2%) | 93 (11.4%) | 93 (15.2%) | 442 (11.1%) |

*Continuous variables presented as mean (standard deviation)*

**Table S9: Characteristics of the Parkinson's disease case sample.**

|  | Germany | Italy | Spain | The Netherlands | United Kingdom | Overall |
| --- | --- | --- | --- | --- | --- | --- |
|  | (N=89) | (N=124) | (N=92) | (N=47) | (N=151) | (N=503) |
| Age (years) | 56.9 (5.45) | 56.1 (6.43) | 56.5 (6.02) | 58.9 (7.67) | 65.9 (7.30) | 59.5 (7.83) |
| sex |  |  |  |  |  |  |
| Male | 57 (64.0%) | 55 (44.4%) | 52 (56.5%) | 5 (10.6%) | 94 (62.3%) | 263 (52.3%) |
| Female | 32 (36.0%) | 69 (55.6%) | 40 (43.5%) | 42 (89.4%) | 57 (37.7%) | 240 (47.7%) |
| Level of Education |  |  |  |  |  |  |
| None | 0 (0%) | 4 (3.2%) | 44 (47.8%) | 0 (0%) | 0 (0%) | 48 (9.5%) |
| Primary school completed | 27 (30.3%) | 51 (41.1%) | 37 (40.2%) | 7 (14.9%) | 53 (35.1%) | 175 (34.8%) |
| Technical/professional school | 25 (28.1%) | 24 (19.4%) | 5 (5.4%) | 11 (23.4%) | 45 (29.8%) | 110 (21.9%) |
| Secondary school | 5 (5.6%) | 24 (19.4%) | 2 (2.2%) | 16 (34.0%) | 17 (11.3%) | 64 (12.7%) |
| Longer education (incl. University deg.) | 32 (36.0%) | 17 (13.7%) | 4 (4.3%) | 12 (25.5%) | 14 (9.3%) | 79 (15.7%) |
| Missing | 0 (0%) | 4 (3.2%) | 0 (0%) | 1 (2.1%) | 22 (14.6%) | 27 (5.4%) |
| BMI (kg/m2) | 26.4 (3.36) | 25.3 (3.60) | 29.0 (3.36) | 25.9 (3.76) | 26.0 (3.81) | 26.4 (3.80) |
| Alcohol consumption (grams/day) | 19.4 (21.1) | 19.3 (20.5) | 16.6 (21.4) | 11.3 (14.2) | 7.26 (10.3) | 14.4 (18.5) |
| Missing | 0 (0%) | 4 (3.2%) | 0 (0%) | 1 (2.1%) | 0 (0%) | 5 (1.0%) |
| Smoking Status |  |  |  |  |  |  |
| Never | 43 (48.3%) | 59 (47.6%) | 59 (64.1%) | 29 (61.7%) | 60 (39.7%) | 250 (49.7%) |
| Former | 34 (38.2%) | 40 (32.3%) | 14 (15.2%) | 15 (31.9%) | 67 (44.4%) | 170 (33.8%) |
| Smoker | 12 (13.5%) | 21 (16.9%) | 19 (20.7%) | 3 (6.4%) | 17 (11.3%) | 72 (14.3%) |
| Missing | 0 (0%) | 4 (3.2%) | 0 (0%) | 0 (0%) | 7 (4.6%) | 11 (2.2%) |
| Physical activity (METS recreational and household activity) | 95.7 (53.6) | 90.1 (55.6) | 81.5 (53.3) | 108 (59.7) | 88.9 (47.1) | 90.8 (53.1) |
| Missing | 0 (0%) | 4 (3.2%) | 0 (0%) | 4 (8.5%) | 9 (6.0%) | 17 (3.4%) |
| Cambridge physical activity index |  |  |  |  |  |  |
| Inactive | 18 (20.2%) | 26 (21.0%) | 34 (37.0%) | 2 (4.3%) | 64 (42.4%) | 144 (28.6%) |
| Moderately inactive | 26 (29.2%) | 58 (46.8%) | 35 (38.0%) | 11 (23.4%) | 42 (27.8%) | 172 (34.2%) |
| Moderately active | 26 (29.2%) | 24 (19.4%) | 12 (13.0%) | 12 (25.5%) | 21 (13.9%) | 95 (18.9%) |
| Active | 19 (21.3%) | 12 (9.7%) | 11 (12.0%) | 18 (38.3%) | 15 (9.9%) | 75 (14.9%) |
| Missing | 0 (0%) | 4 (3.2%) | 0 (0%) | 4 (8.5%) | 9 (6.0%) | 17 (3.4%) |
| Healthy score for diet (range 0-54) | 28.2 (5.85) | 26.7 (7.04) | 31.8 (6.19) | 28.4 (6.25) | 23.0 (6.56) | 26.9 (7.13) |
| Missing | 2 (2.2%) | 4 (3.2%) | 4 (4.3%) | 1 (2.1%) | 3 (2.0%) | 14 (2.8%) |
| Healthy lifestyle index (range 0 - 20) | 11.9 (3.29) | 11.1 (3.25) | 11.8 (3.03) | 12.9 (2.61) | 12.0 (2.89) | 11.8 (3.10) |
| Missing | 3 (3.4%) | 4 (3.2%) | 5 (5.4%) | 6 (12.8%) | 21 (13.9%) | 39 (7.8%) |
| Prevalent MI/Stroke reported |  |  |  |  |  |  |
| No | 86 (96.6%) | 121 (97.6%) | 91 (98.9%) | 45 (95.7%) | 138 (91.4%) | 481 (95.6%) |
| Yes | 3 (3.4%) | 3 (2.4%) | 1 (1.1%) | 2 (4.3%) | 13 (8.6%) | 22 (4.4%) |
| InterAct prevalent diabetes reported |  |  |  |  |  |  |
| No | 77 (86.5%) | 120 (96.8%) | 84 (91.3%) | 46 (97.9%) | 137 (90.7%) | 464 (92.2%) |
| Yes | 8 (9.0%) | 1 (0.8%) | 8 (8.7%) | 1 (2.1%) | 12 (7.9%) | 30 (6.0%) |
| Missing | 4 (4.5%) | 3 (2.4%) | 0 (0%) | 0 (0%) | 2 (1.3%) | 9 (1.8%) |
| Parkinson’s disease |  |  |  |  |  |  |
| Non-case | 0 (%) | 0 (%) | 0 (%) | 0 (%) | 0 (%) | 0 (%) |
| Incident | 89 (100%) | 124 (100%) | 92 (100%) | 47 (100%) | 151 (100%) | 503 (100%) |
| Parkinson’s disease Follow up time (yrs) | 11.3 (4.74) | 11.9 (5.57) | 10.8 (4.17) | 9.70 (5.10) | 6.48 (3.22) | 9.77 (5.02) |
| Death event |  |  |  |  |  |  |
| Non-case | 75 (84.3%) | 118 (95.2%) | 75 (81.5%) | 40 (85.1%) | 53 (35.1%) | 361 (71.8%) |
| Incident | 14 (15.7%) | 6 (4.8%) | 17 (18.5%) | 7 (14.9%) | 98 (64.9%) | 142 (28.2%) |
| Any first CVD event (CHD/Stroke) (fatal/non-fatal) | |  |  |  |  |  |
| Non-case | 88 (98.9%) | 121 (97.6%) | 83 (90.2%) | 43 (91.5%) | 106 (70.2%) | 441 (87.7%) |
| Incident | 1 (1.1%) | 3 (2.4%) | 9 (9.8%) | 4 (8.5%) | 45 (29.8%) | 62 (12.3%) |
| Type 2 diabetes status |  |  |  |  |  |  |
| Non-case | 81 (91.0%) | 119 (96.0%) | 81 (88.0%) | 47 (100%) | 141 (93.4%) | 469 (93.2%) |
| Incident | 4 (4.5%) | 2 (1.6%) | 11 (12.0%) | 0 (0%) | 8 (5.3%) | 25 (5.0%) |
| Missing | 4 (4.5%) | 3 (2.4%) | 0 (0%) | 0 (0%) | 2 (1.3%) | 9 (1.8%) |
| Any malignant cancer |  |  |  |  |  |  |
| Non-case | 84 (94.4%) | 113 (91.1%) | 81 (88.0%) | 42 (89.4%) | 133 (88.1%) | 453 (90.1%) |
| Incident | 5 (5.6%) | 11 (8.9%) | 11 (12.0%) | 5 (10.6%) | 18 (11.9%) | 50 (9.9%) |
